# Supplementary material for: Longitudinal analysis of the gut microbiota during anti-PD-1 therapy reveals stable microbial features of response in melanoma patients
Source: PubMed Central journal article supplement — Cell Host Microbe. Author manuscript; Available in PMC 2024 Dec 10. (PMC11629153; doi:10.1016/j.chom.2024.10.006), 2024-10-30
Supplement: NIHMS2032800-supplement-MMC1.pdf [file NIHMS2032800-supplement-MMC1.pdf]

**Supplemental information**

**Longitudinal analysis of the gut microbiota  
during anti-PD-1 therapy reveals stable microbial  
features of response in melanoma patients**

**Angeli D.G. Macandog, Carlotta Catozzi, Mariaelena Capone, Amir Nabinejad, Padma P. Nanaware, Shujing Liu, Smita Vinjamuri, Johanna A. Stunnenberg, Serena Galiè, Maria Giovanna Jodice, Francesca Montani, Federica Armanini, Ester Cassano, Gabriele Madonna, Domenico Mallardo, Benedetta Mazzi, Salvatore Pece, Maria Tagliamonte, Vito Vanella, Massimo Barberis, Pier F. Ferrucci, Christian U. Blank, Marlene Bouvier, Miles C. Andrews, Xiaowei Xu, Laura Santambrogio, Nicola Segata, Luigi Buonaguro, Emilia Cocorocchio, Paolo A. Ascierto, Teresa Manzo, and Luigi Nezi**

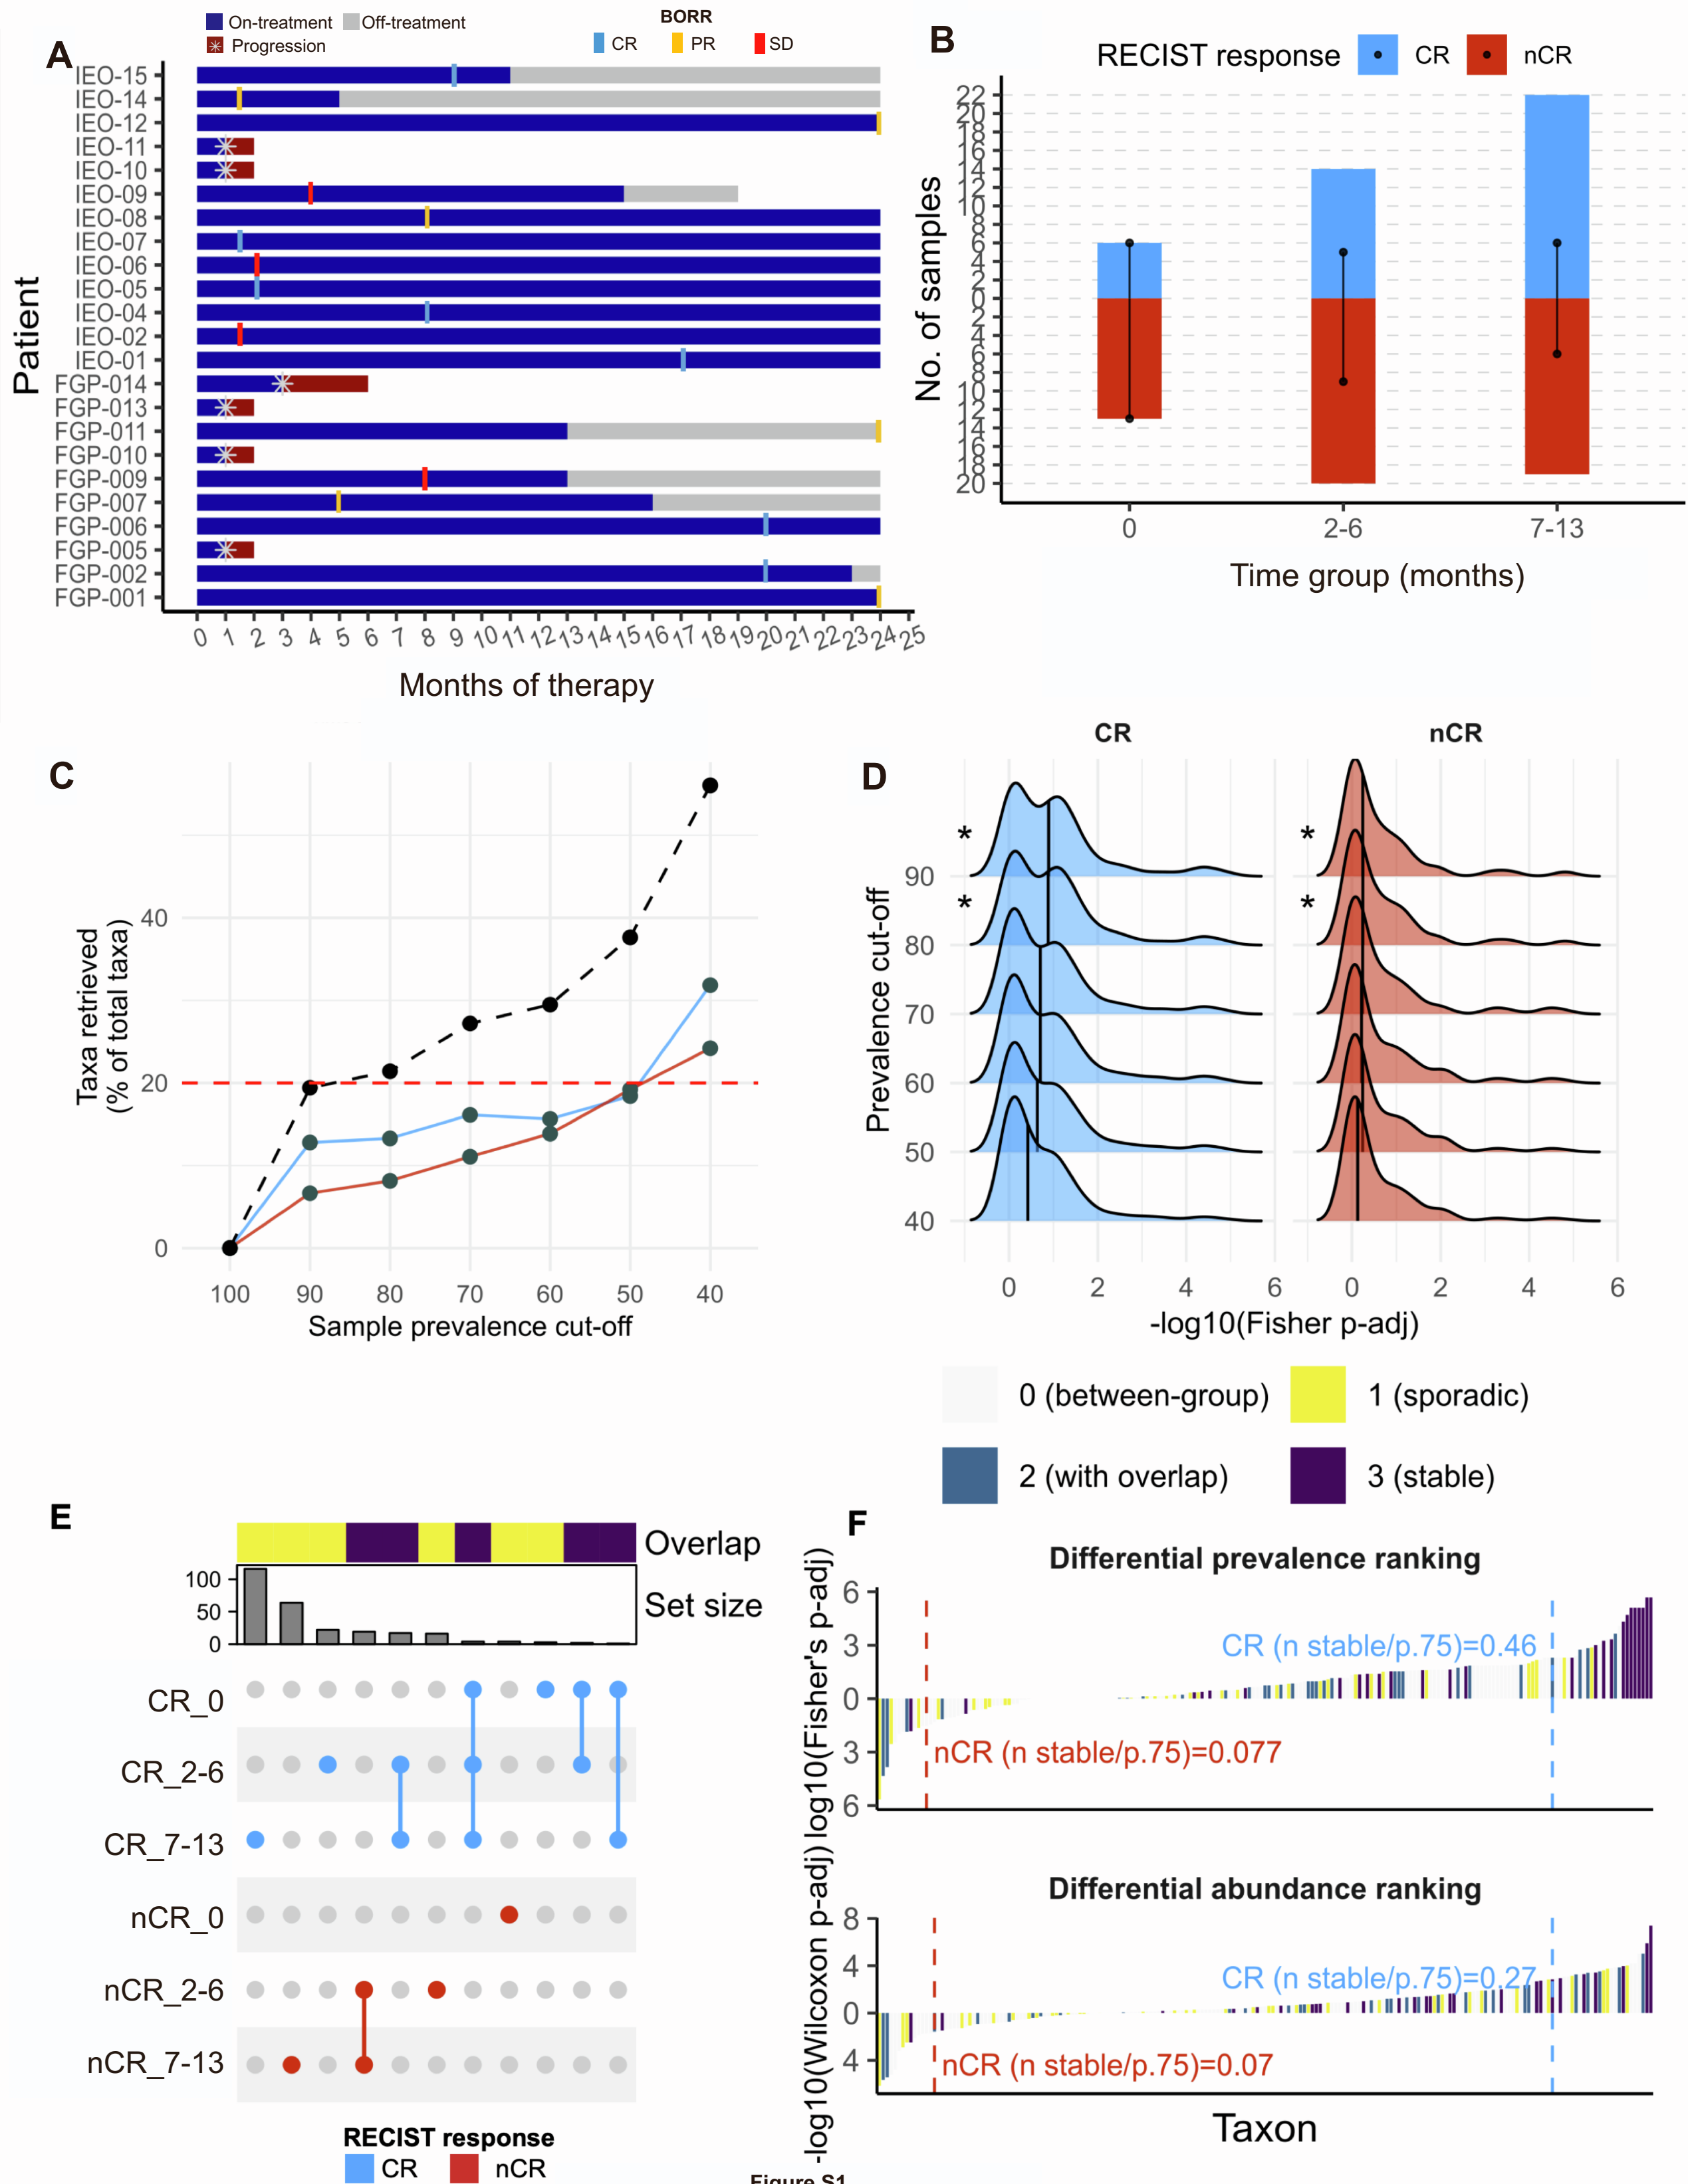

Figure S1

**Figure S1. Defining complete response (CR)-associated taxa by within-group prevalence and longitudinal stability, related to Figure 1.**

**(A)** Clinical status of patients during therapy. RECIST 1.1 Best Overall Response (BOR) at two-years is indicated. **(B)** Shotgun sequencing frequency distribution of melanoma CR and nCR samples across time in aggregated months (0, 2–6, and 7–13 months of therapy). Inset line segments (black) indicate number of samples from non-redundant patients. **(C)** Number of taxa retrieved (% of total) at each prevalence cut-off within CR (blue), within nCR (red), and total (dashed), across timepoint groups. Dashed horizontal red line indicates cut-off of 20% taxa retrieved. **(D)** Distribution of Fisher's exact test p-values ( $-\log_{10}(p\text{-adj})$ ) for CR/nCR association of taxa retrieved at increasing within-group sample prevalence cut-off, from 40% (not prevalent) to 80% (highly prevalent). Density plots are grouped into CR- (left) and nCR- (right) associated based on odds ratio. **(E)** Differentially abundant taxa overlap at 0, 2–6, and 7–13 months in CR and nCR. Connecting dots indicate taxa shared between timepoint groups ("with overlap"), whereas non-connected dots indicate taxa detected only in one timepoint group ("spurious"). "Stable" taxa are defined as within-CR and within-nCR prevalent taxa that are present across at least any two timepoints from 0, 2–6, and 7–13 months. **(F)** Ranking of prevalent taxa by differential prevalence (top) and differential abundance (bottom). Colors indicate degree of group-specific overlap, from not group-specific (white), sporadic (yellow), overlap between two timepoints (teal), and overlap across all three timepoints (violet). Annotations indicate the proportion of taxa that are stable (i.e., prevalent within a group across timepoints) among those in the 75th percentile of differential ranking.

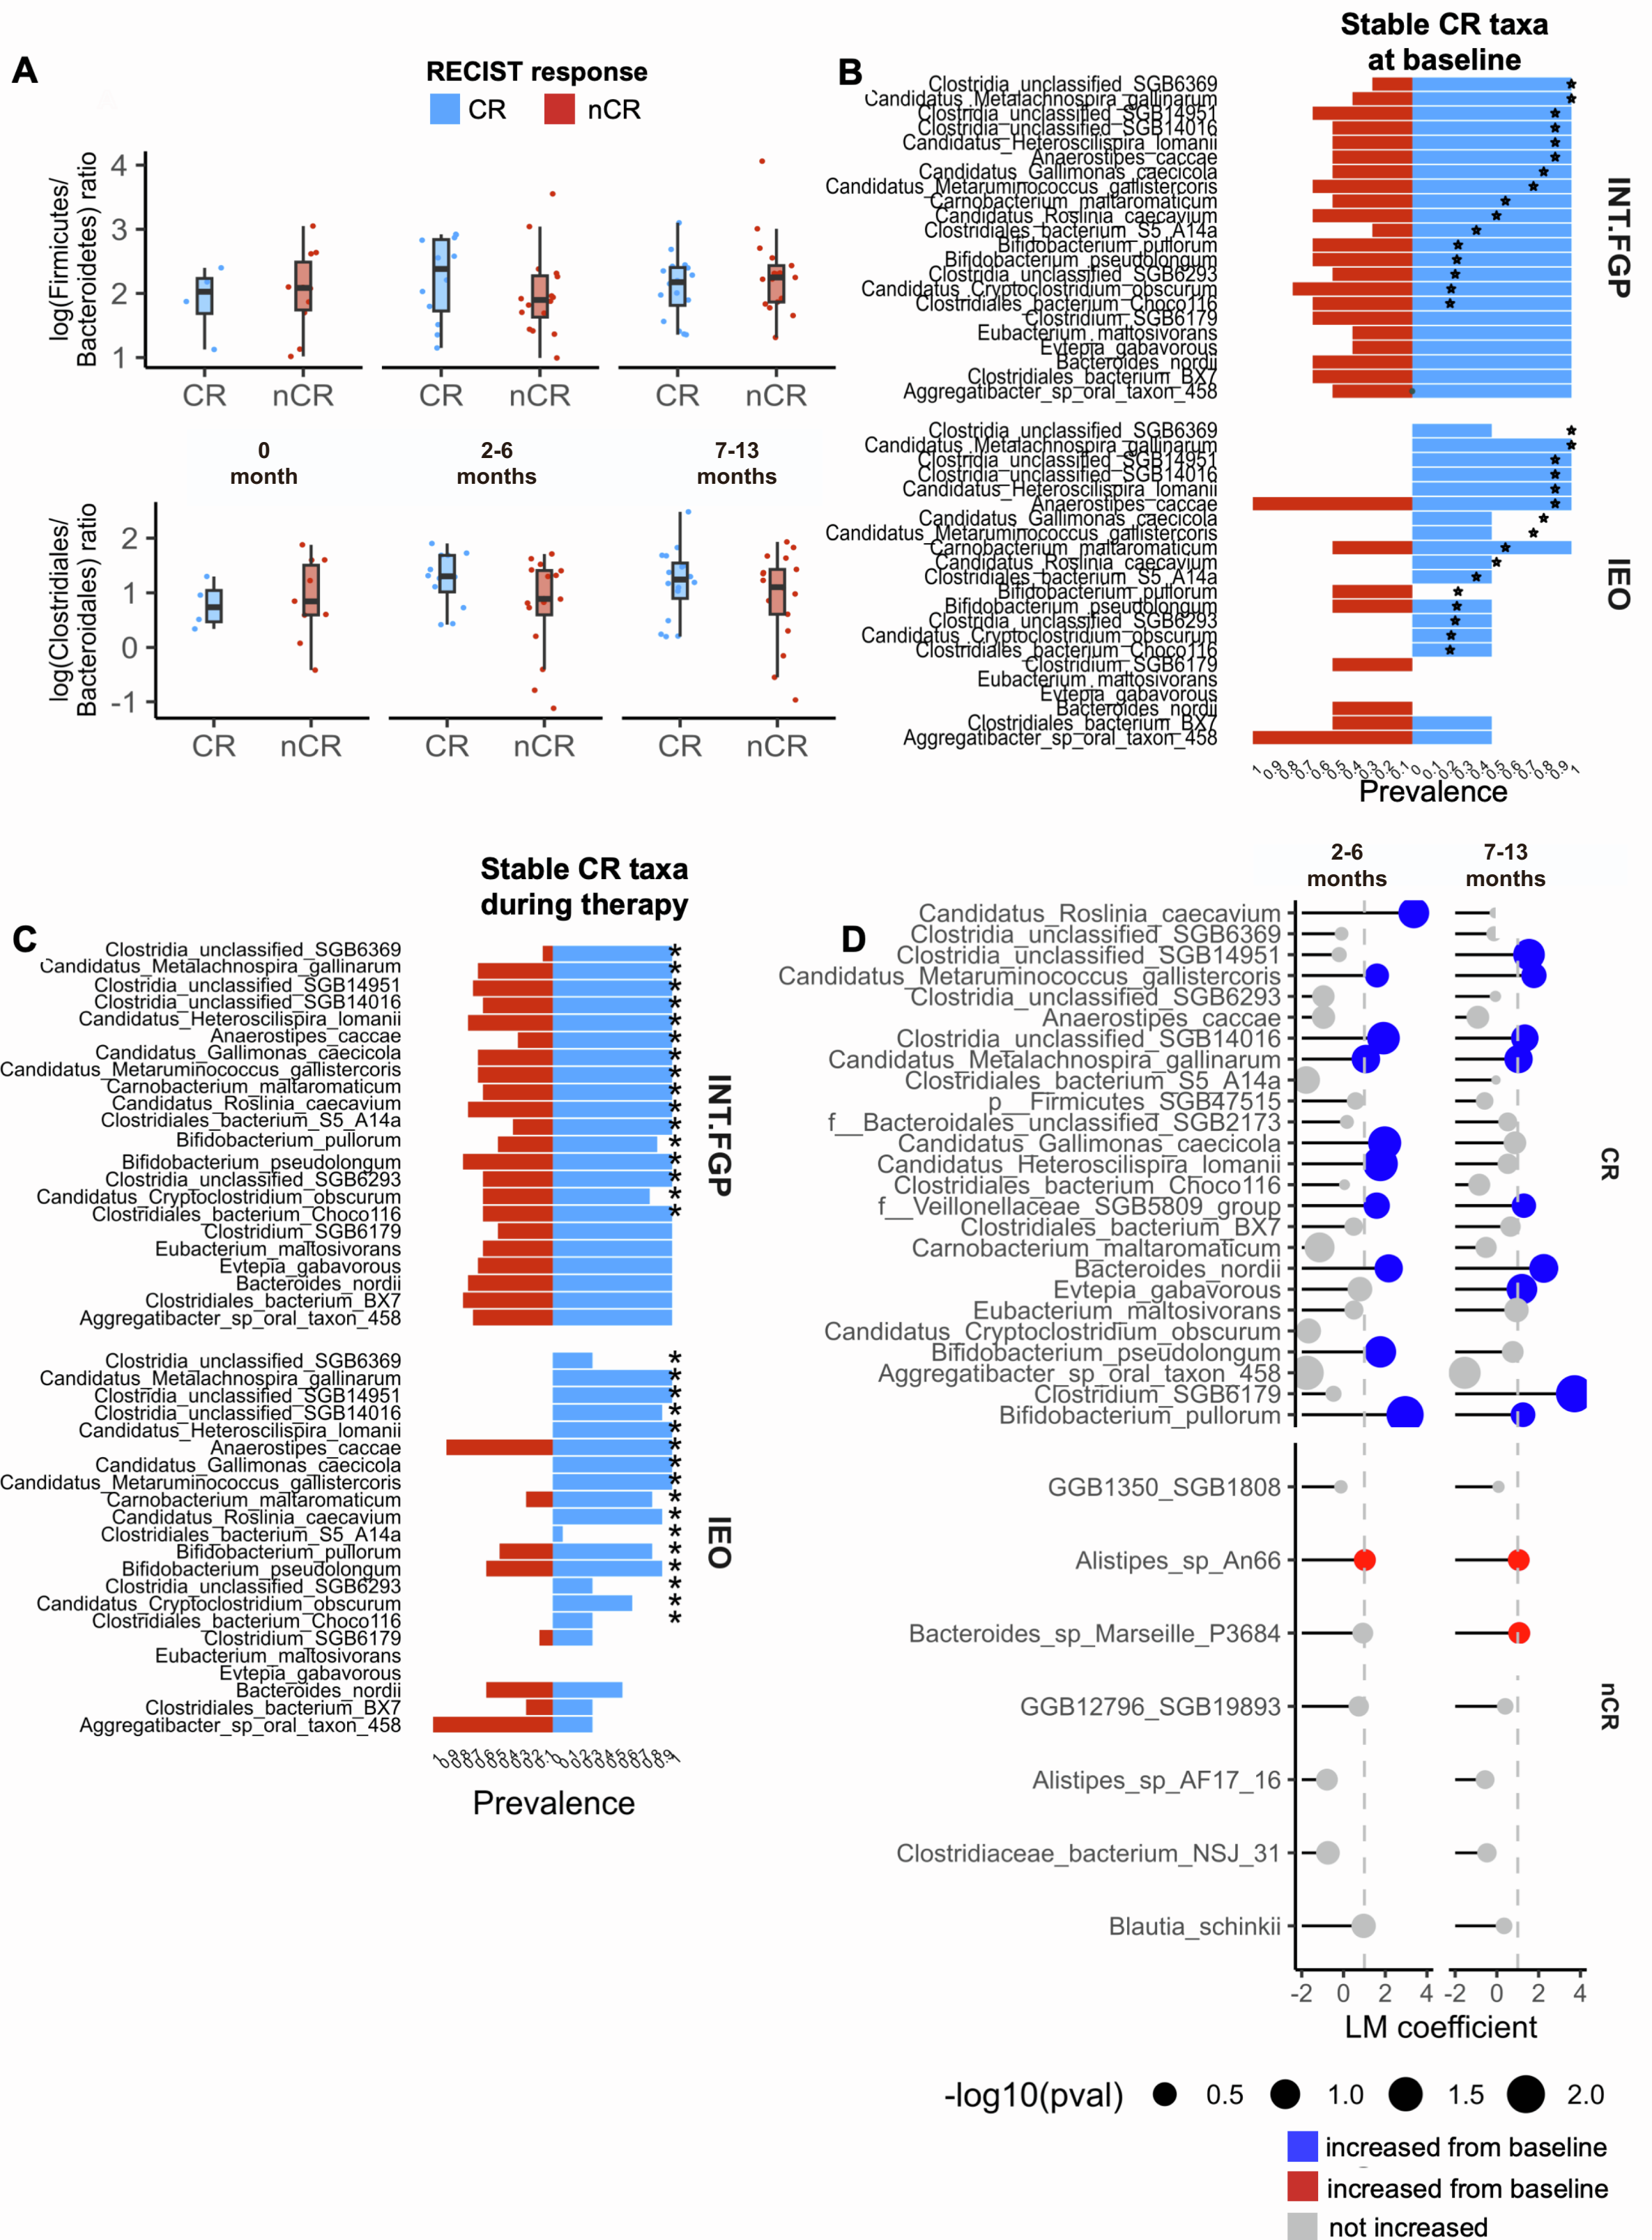

Figure S2

**Figure S2. Assessment of stable taxa in complete response (CR) and non-CR groups by differential prevalence and abundance, related to Figure 1.**

**(A)** Comparison of phylum-level Firmicutes/Bacteroidetes ratio (top), and order-level Clostridiales/Bacteroidales ratio (bottom) between complete responders (CR) and not-complete responders (nCR) at 0, 2–6, and 7–13 months. Ratios are log-transformed for visualization purposes. **(B)** Prevalence barplot of stable CR taxa in CR and nCR groups at baseline, and **(C)** during therapy. Inset points indicate significance in differential prevalence ranking by Fisher's exact test ( $-\log_{10}(p\text{-adj}) > 1.3$  (\*); ns (.)), scaled by the maximum significance. **(D)** Differential abundance of CR (blue) and nCR (red) stable taxa on log-transformed relative abundance, based on Maaslin2 linear model (LM) coefficient, using 'Timepoint group' as fixed effect and 'Patient\_number' and 'Study' as random effects. Gray dashed line indicates arbitrary cut-off for increase at LM coefficient  $> 1.0$ . Colored circles indicate taxa increased from baseline. Size of circle indicates level of significance for increase ( $-\log_{10}(p\text{-value})$ ). Legend:  $p\text{-adj} < 0.001$  (\*\*\*),  $p\text{-adj} < 0.01$  (\*\*),  $p\text{-adj} < 0.05$  (\*), ns (unannotated).

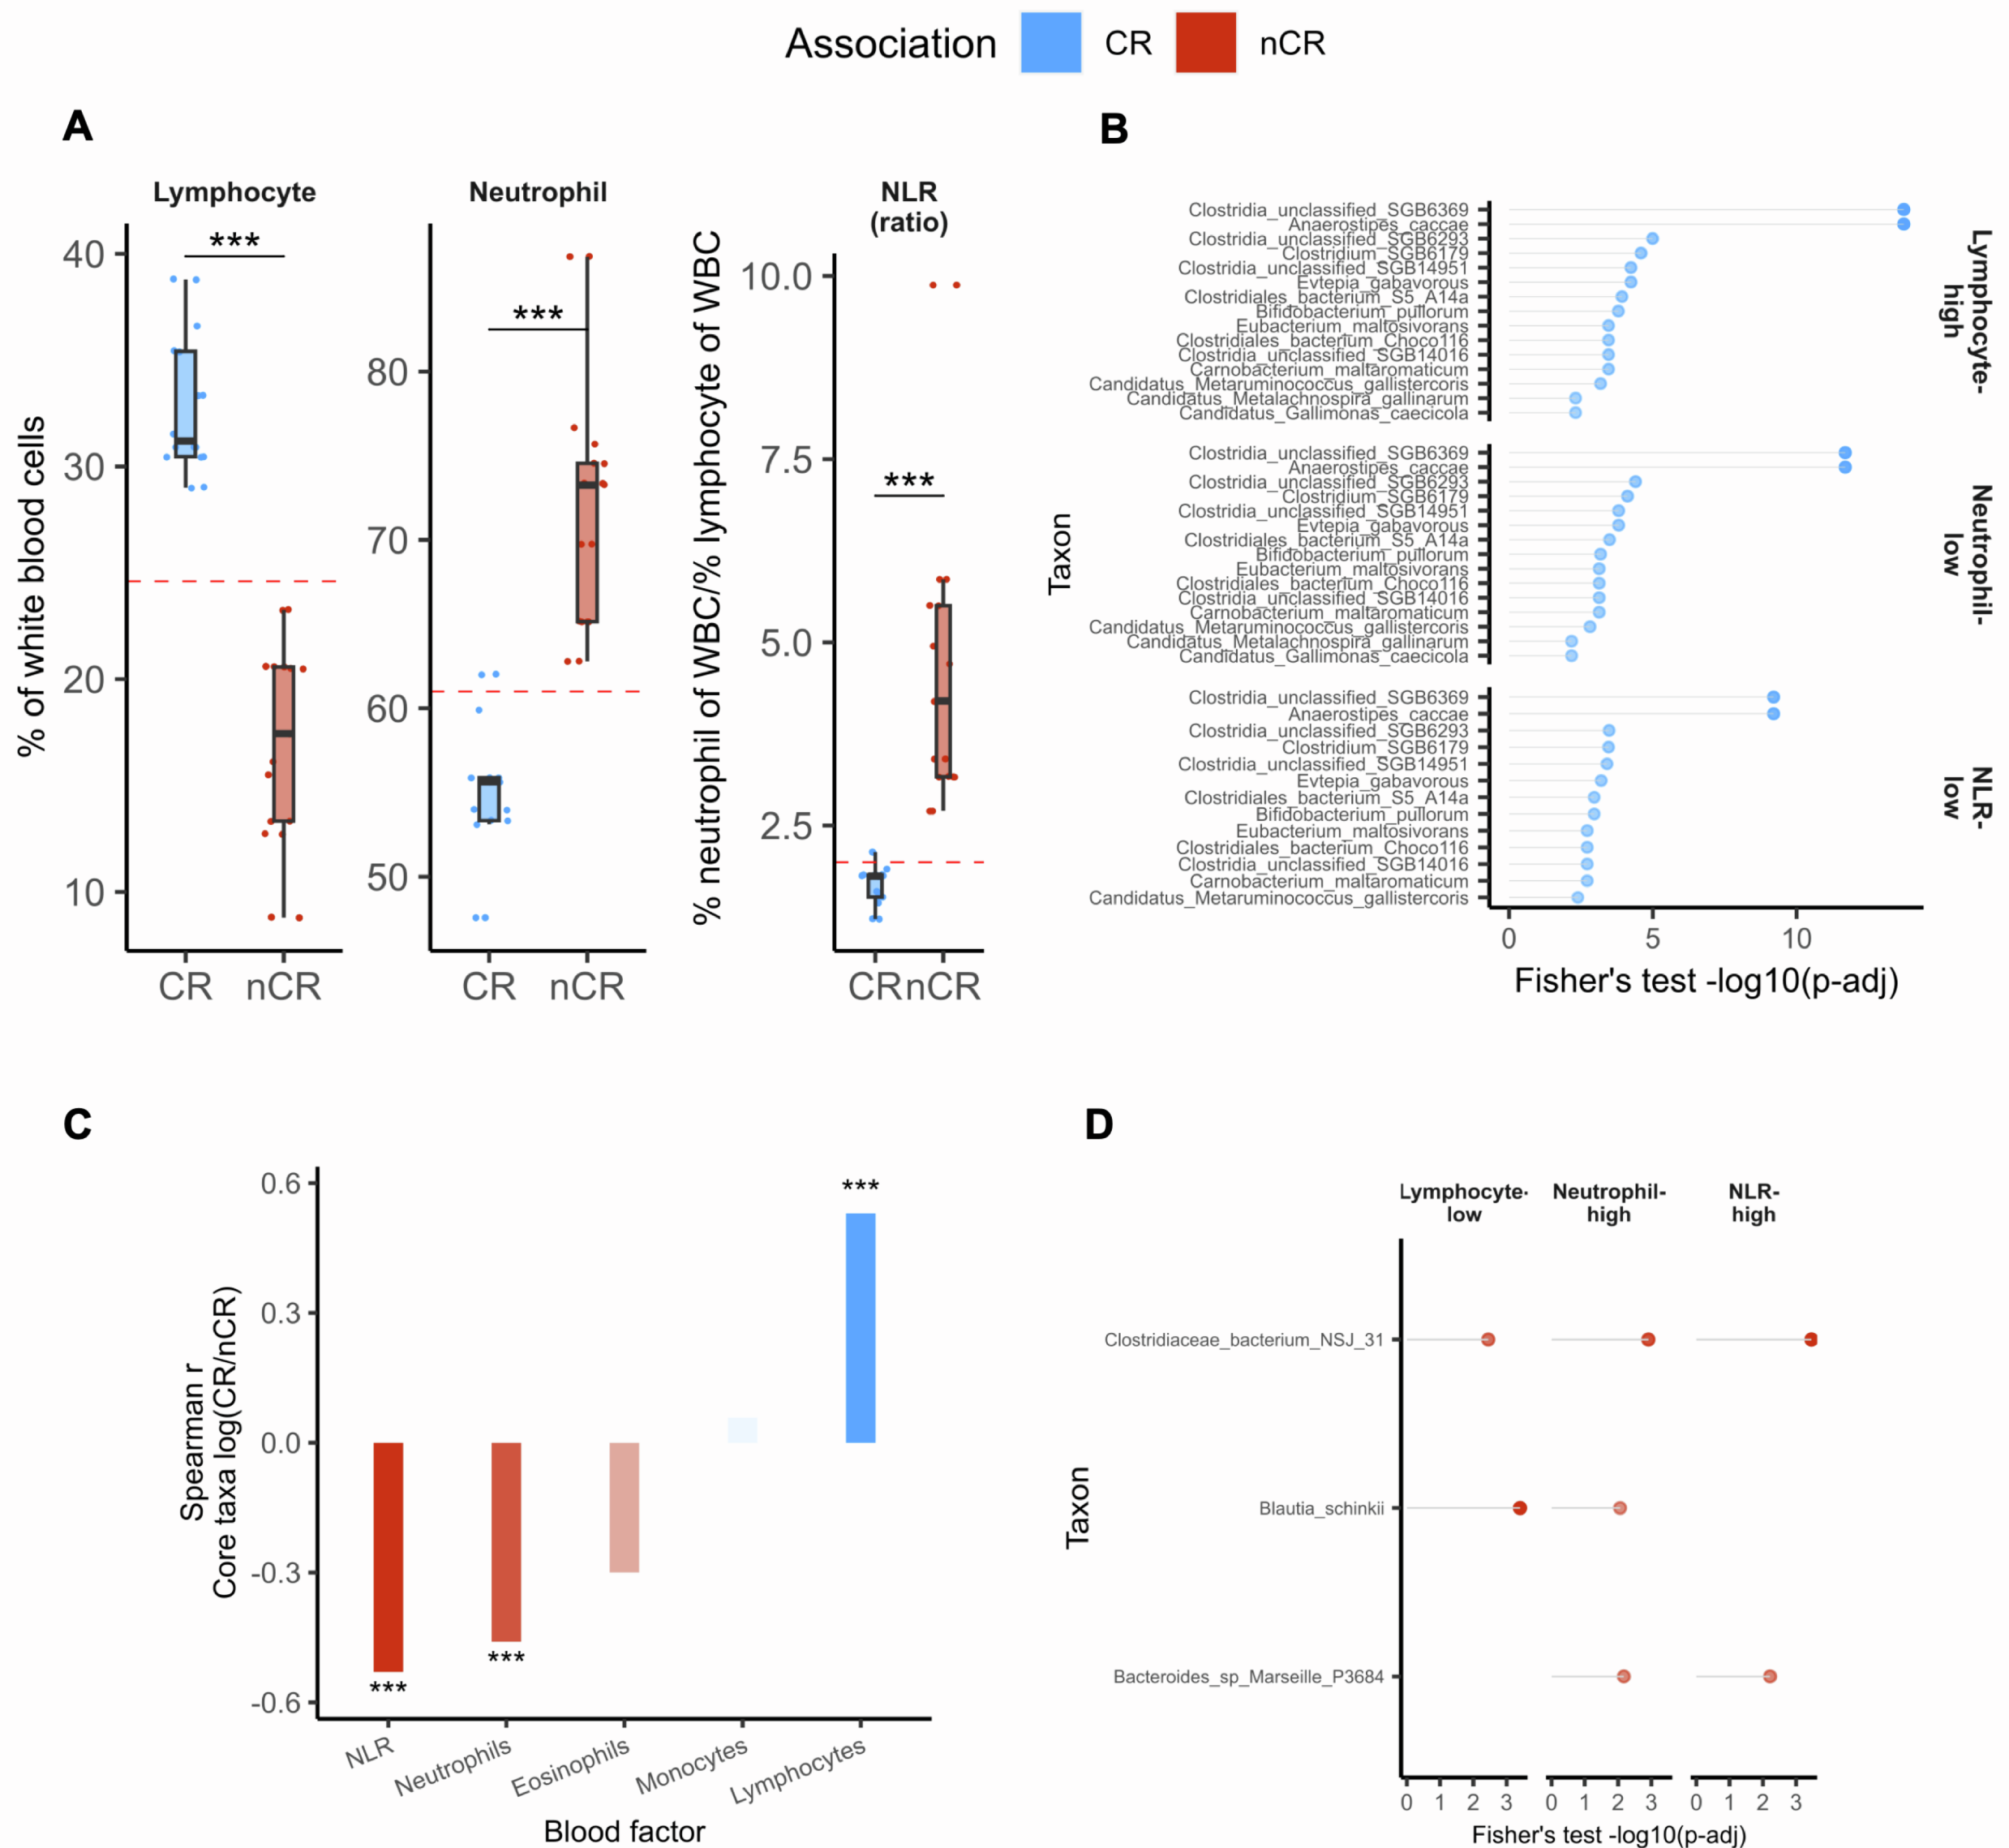

**Figure S3. Defining complete response (CR) by white blood cell profile, related to Figure 1.**

(A) Comparison of peripheral blood factors (percent of total) between CR and nCR samples at therapy timepoints. Dashed red lines indicate cut-offs for “high” or “low” based on distribution (low-lymphocyte < 0.246; low-neutrophil < 0.61; low-NLR cut-off < 2). (B) Fisher’s test of association between stable CR taxa presence and “lymphocyte-high”, “neutrophil-low”, and “NLR-low” cases among therapy samples. Taxa are filtered to include only significantly associated taxa at  $p\text{-adj} < 0.01$ . (C) Spearman correlation of stable taxa measure ( $\log(\text{CR}/\text{nCR})$ ) with lymphocytes ( $r=0.65$ ), neutrophils ( $r=-0.53$ ) and NLR ( $r=-0.61$ ). (D) Fisher’s test of association between stable nCR gut microbiota taxa (red) and blood environments, “lymphocyte-low”, “neutrophil-high”, and “NLR-high” during therapy. Taxa are filtered to include only significantly associated taxa at  $p\text{-adj} < 0.01$ ; Color indicates taxa belonging to stable nCR denominator (red).

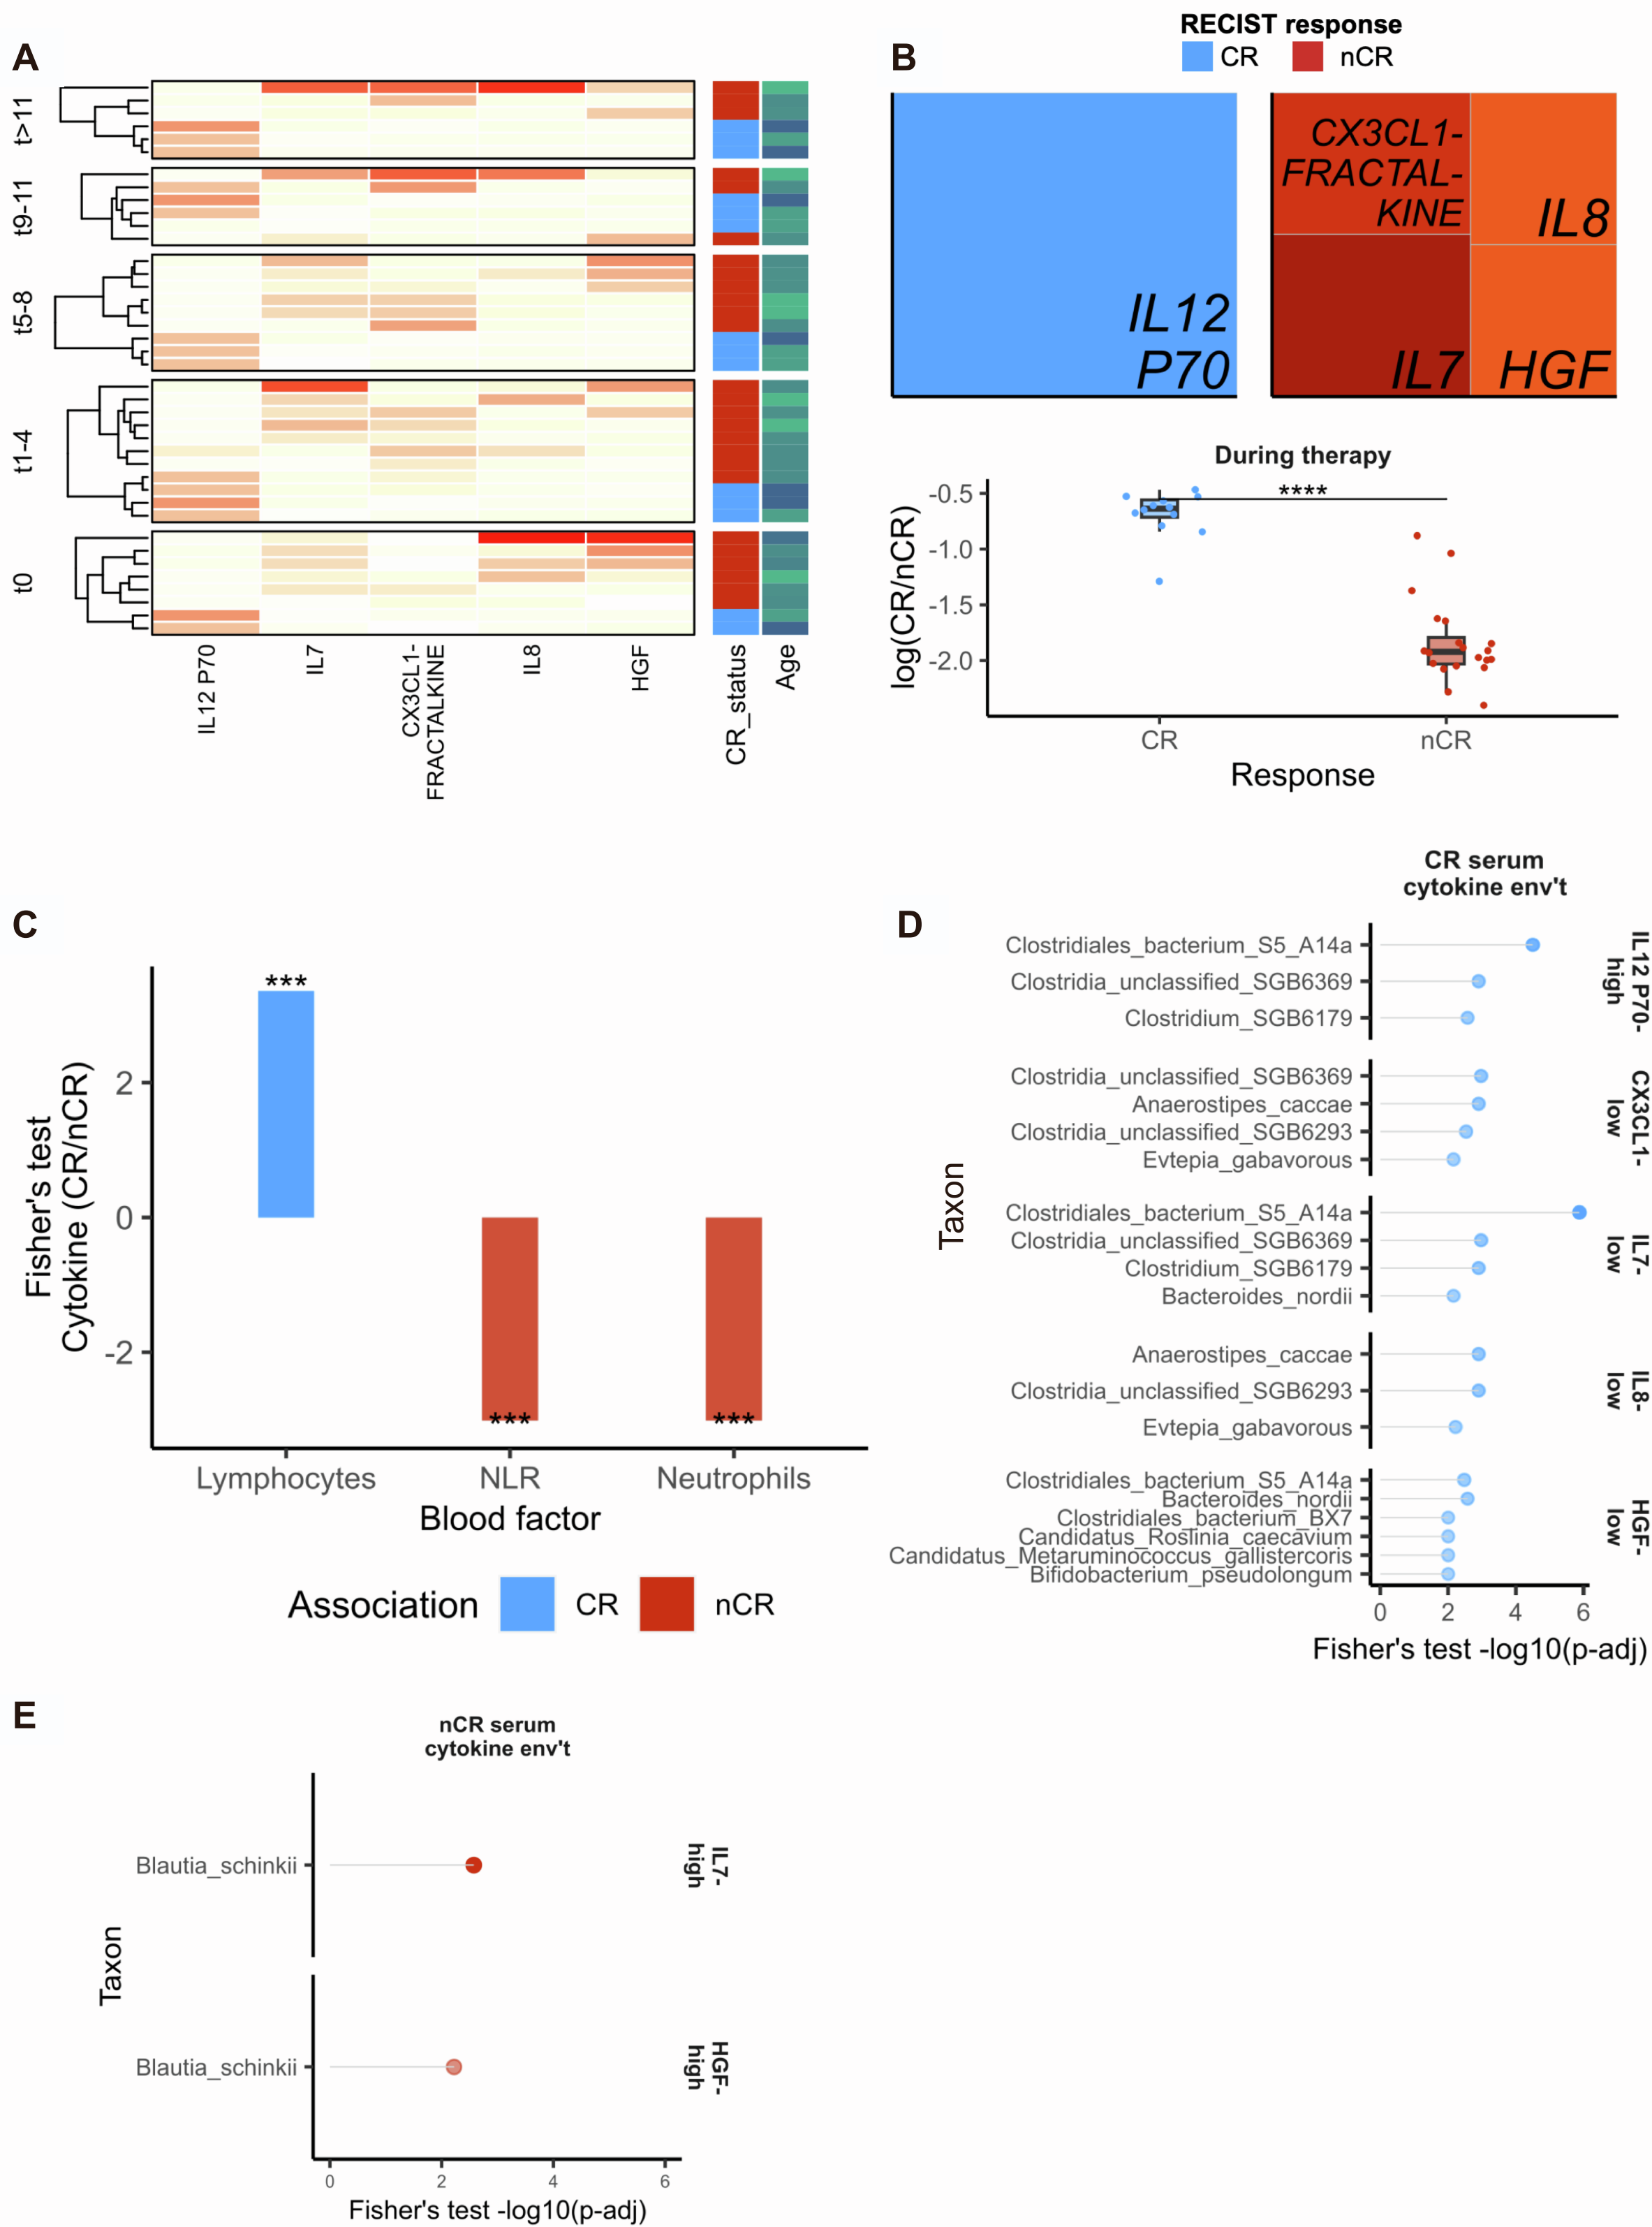

Figure S4

**Figure S4. Defining complete response (CR) by serum soluble factor, related to Figure 1.**

**(A)** Heatmap of soluble factor quantities in serum (SD of mean pg/mL) of top CR and nCR-associated cytokines, at 0, 1–4, 5–8, 9–11, and >11 months. **(B)** CR- and nCR-associated cytokines scaled by their significance ( $-\log_{10}(\text{Wilcoxon } p\text{-adj})$ ) (top), and their corresponding additive log-ratio (ALR) in CR and nCR groups (bottom). **(C)** Fisher's test of association between CR/ nCR cytokine log-ratio and blood environments, "lymphocyte-high", "neutrophil-low", and "NLR". **(D)** Fisher's test of association between stable CR taxa presence and "IL-12P70-high", "CX3CL1/FRACTALKINE-low", "IL7-low", "IL8-low", and "HGF-low" cases among therapy samples. Features are filtered to include only significantly associated taxa at  $p\text{-adj} < 0.01$ . **(E)** Fisher's test of association between stable nCR gut microbiota taxa (red) and serum cytokine status, "IL7-high" and "HGF-high" in therapy timepoints. Taxa are filtered to include only significantly associated taxa at  $p\text{-adj} < 0.01$ . Continuous values from cytokine data were split into binary states by the median value (high:  $>$ median; low:  $\leq$  median).

**Legend:**  $p\text{-adj} < 0.001$  (\*\*\*) ,  $p\text{-adj} < 0.01$  (\*\*) ,  $p\text{-adj} < 0.05$  (\*) , ns (unannotated).



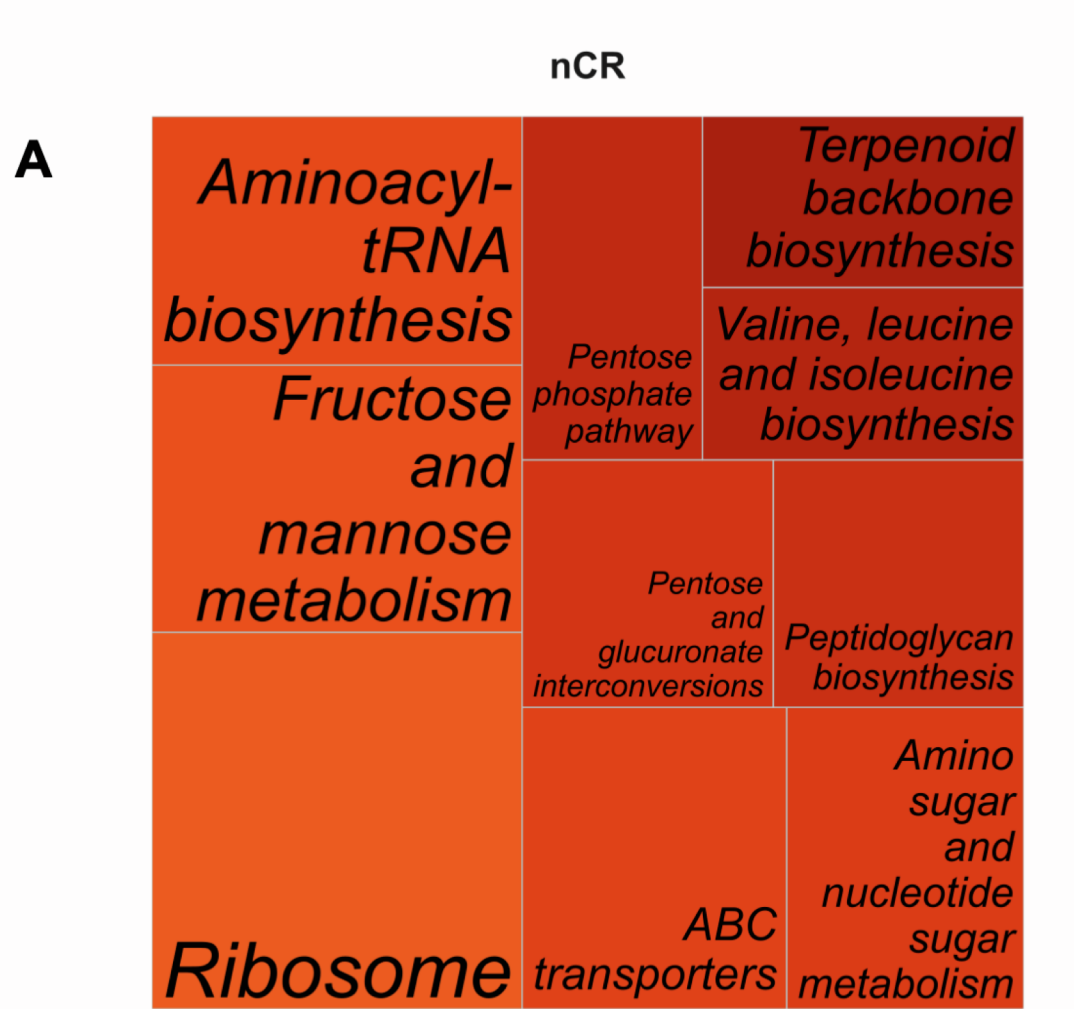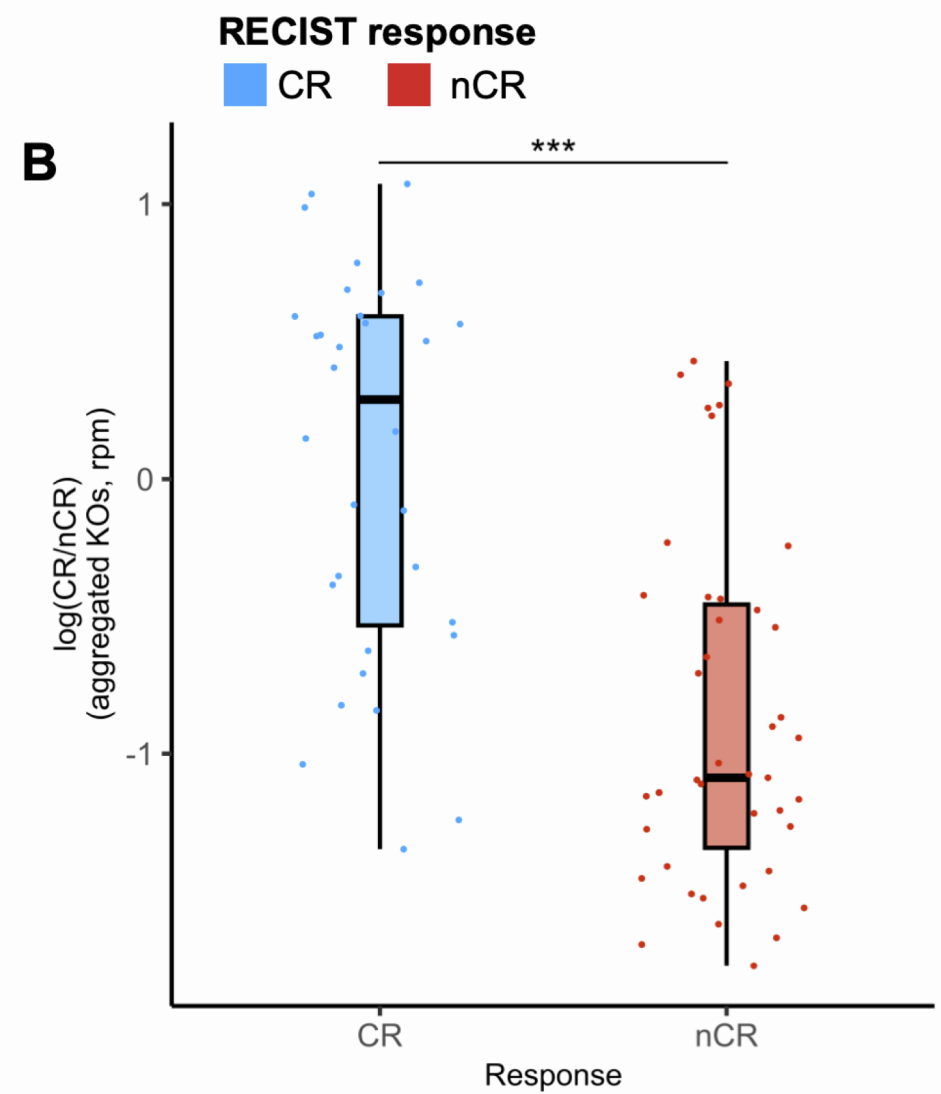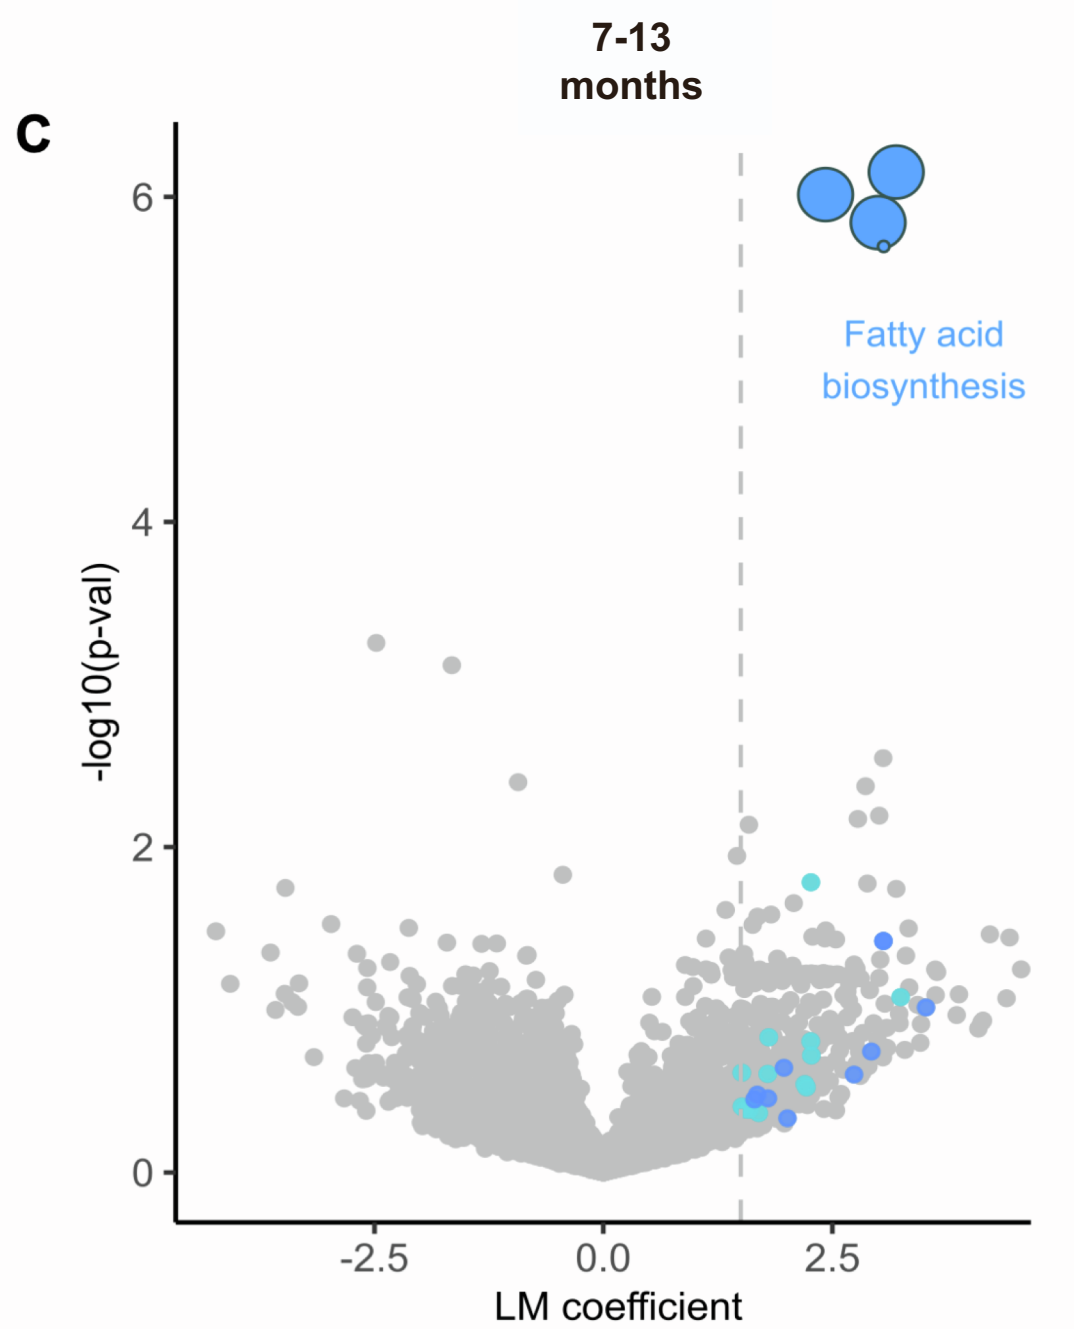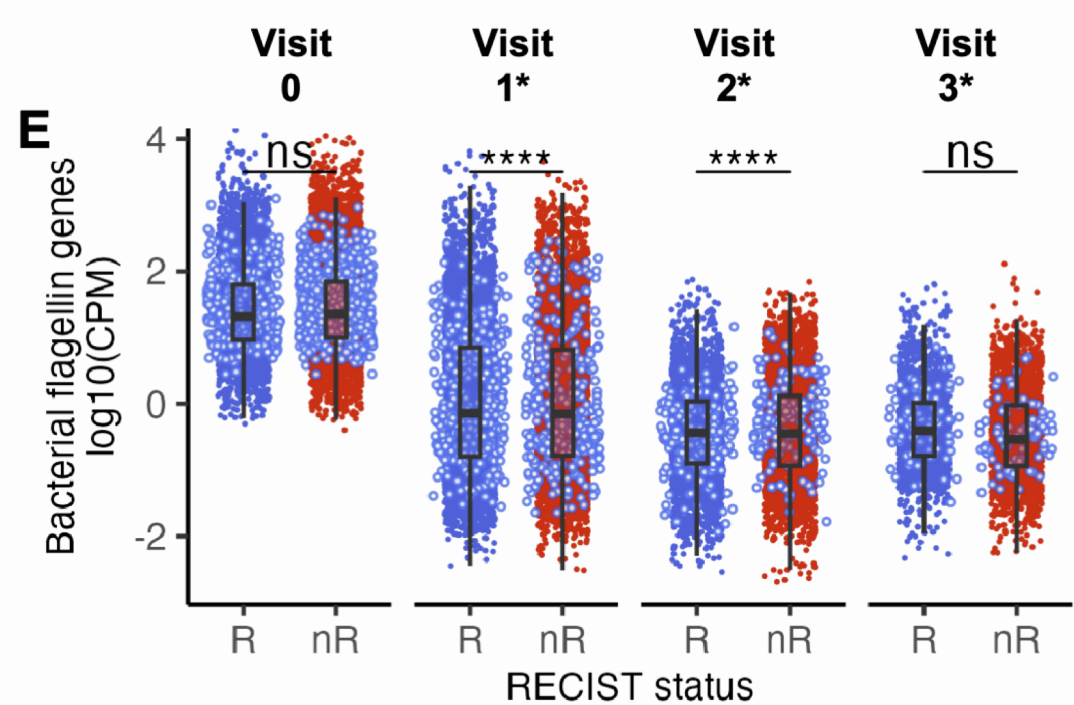

\*ranges from 1-4 months of therapy

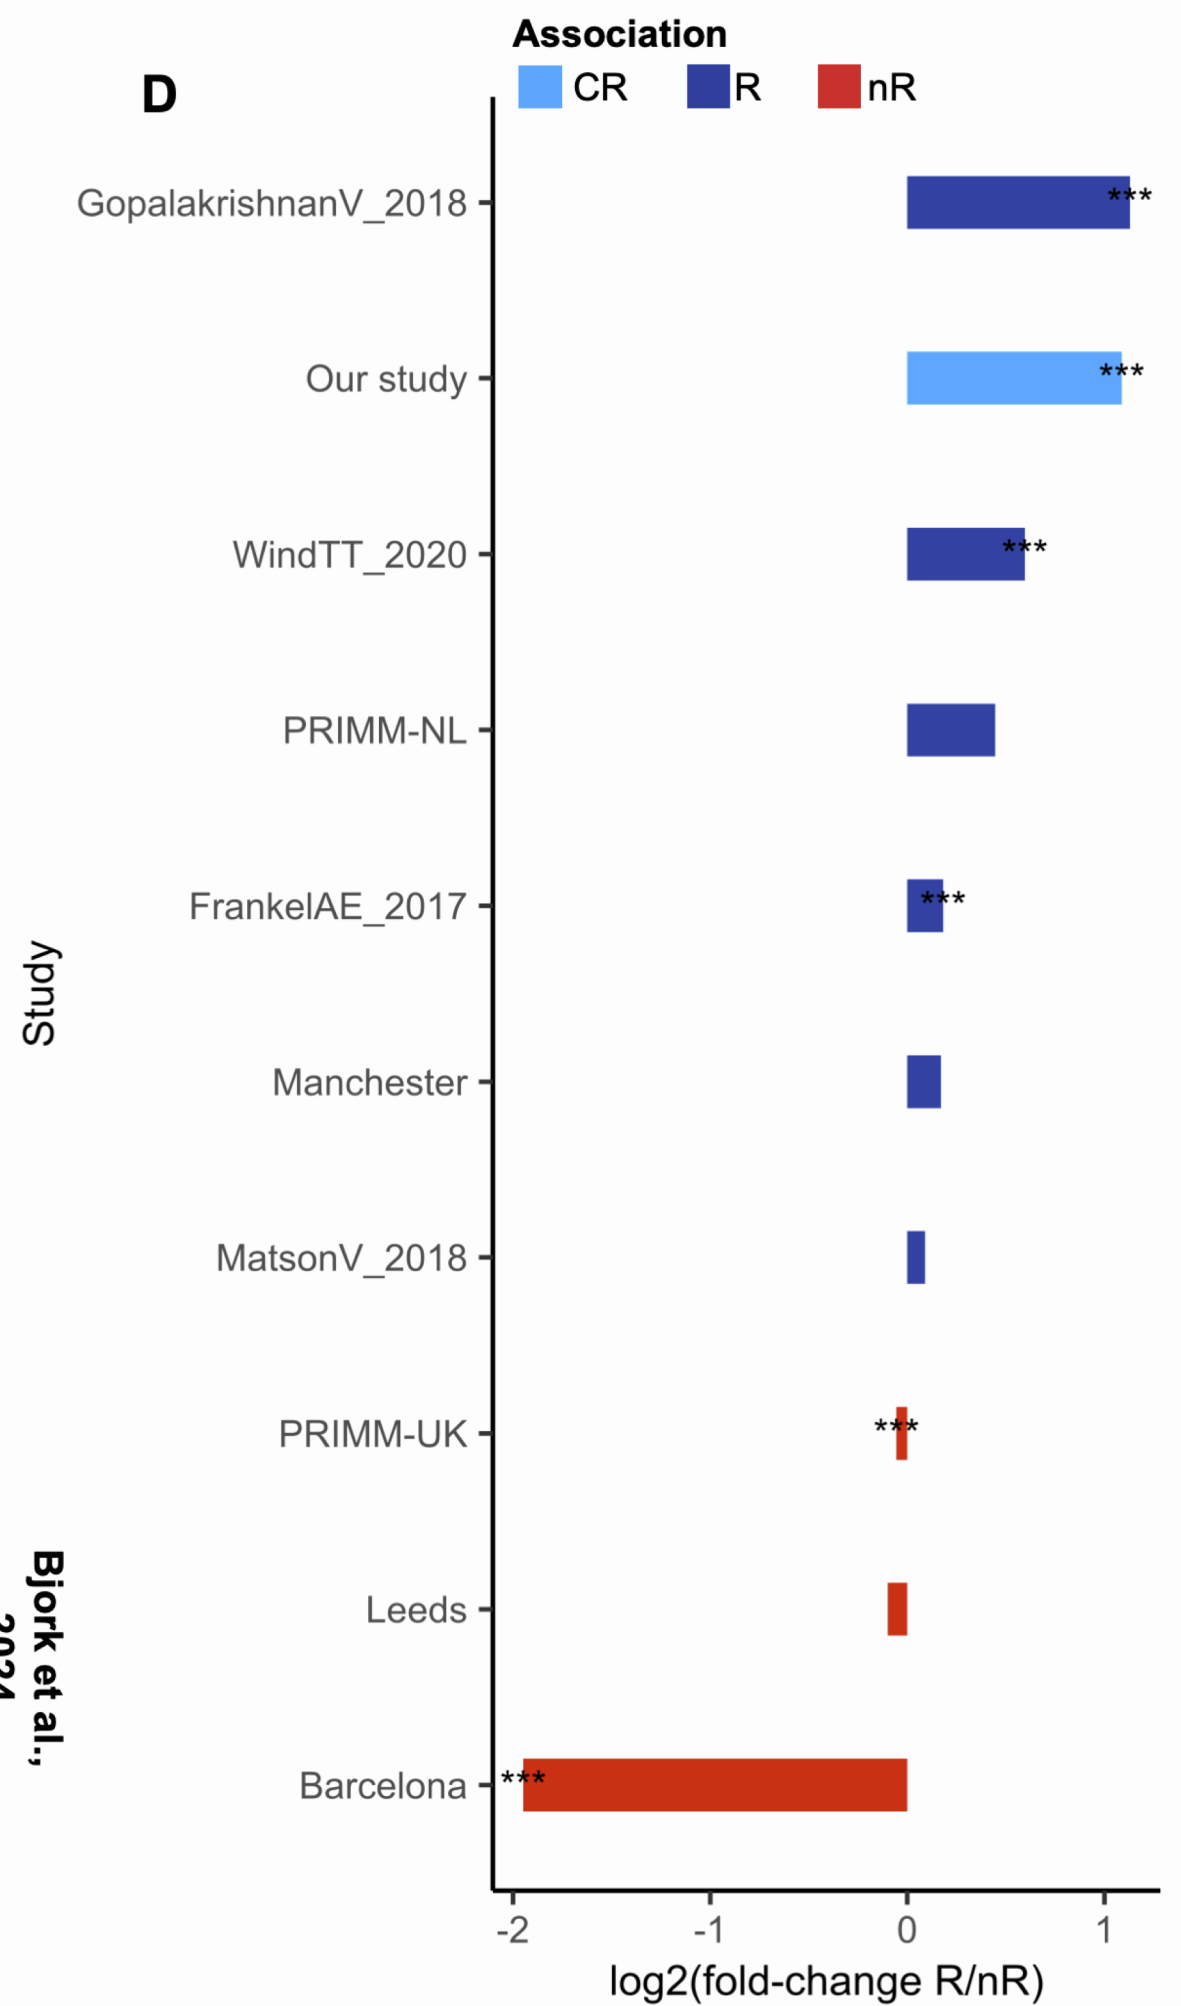

Bjork et al., 2024

Figure S5

**Figure S5. Defining complete response (CR) by metagenome functional predictions, related to Figure 1.**

**(A)** Treemap of over-represented pathways in nCR at  $p\text{-adj} < 0.05$ , based on KOs associated with nCR across all samples ( $|\text{LM coefficient}| > 1.5$ ). Terms in black indicate non-stable pathways. **(B)** Comparison of additive log-ratio (CR/nCR) of aggregated KOs mapping to significantly over-represented pathways ( $p\text{-adj} < 0.05$ ) in CR and nCR groups, compared between CR (left) and nCR (right) pathways. Pathways are further filtered to include only significantly differentially abundant pathways based on aggregated KO abundance ( $p\text{-adj} < 0.1$ ). **(C)** Differentially abundant KOs in CR and nCR at late therapy timepoints. Blue points outlined in gray indicate significant KOs at  $p\text{-adj} < 0.005$ ; positive coefficient refers to CR-associated terms whereas negative coefficient refers to nCR-associated terms. Dashed line indicates cut-off for testing over-represented KOs. Non-outlined blue points indicate KOs that map to over-represented pathways in (B) by the same color. **(D)** Baseline increase in bacteria-associated flagellin genes ( $\log(\text{fold-change in CPM})$ ) in R (right) or nR (left) patients across ten melanoma cohorts, including this study that shows increase in CR (right). Statistics shown are from Wilcoxon rank sum test, whereas magnitude and direction are computed from  $\log_2$  (fold-change) of counts in R/nR for the nine external studies and CR/nCR for our study. **(E)** Average gene family abundances ( $\log_{10}(\text{CPM})$ ) per patient of bacterial flagellin-related terms in R and nR patients in Bjork et al., 2024, compared at visits 0, 1, 2, and 3, spanning 0 to 1-4 months of therapy, depending on patient. Cut-off of  $< 4$  months of therapy was set for this analysis based on sample size distribution across timepoints of this study. Points outlined in blue indicate top CR-associated flagellin genes from our study.

**Legend:**  $p\text{-adj} < 0.001$  (\*\*\*),  $p\text{-adj} < 0.01$  (\*\*),  $p\text{-adj} < 0.05$  (\*), ns (unannotated).

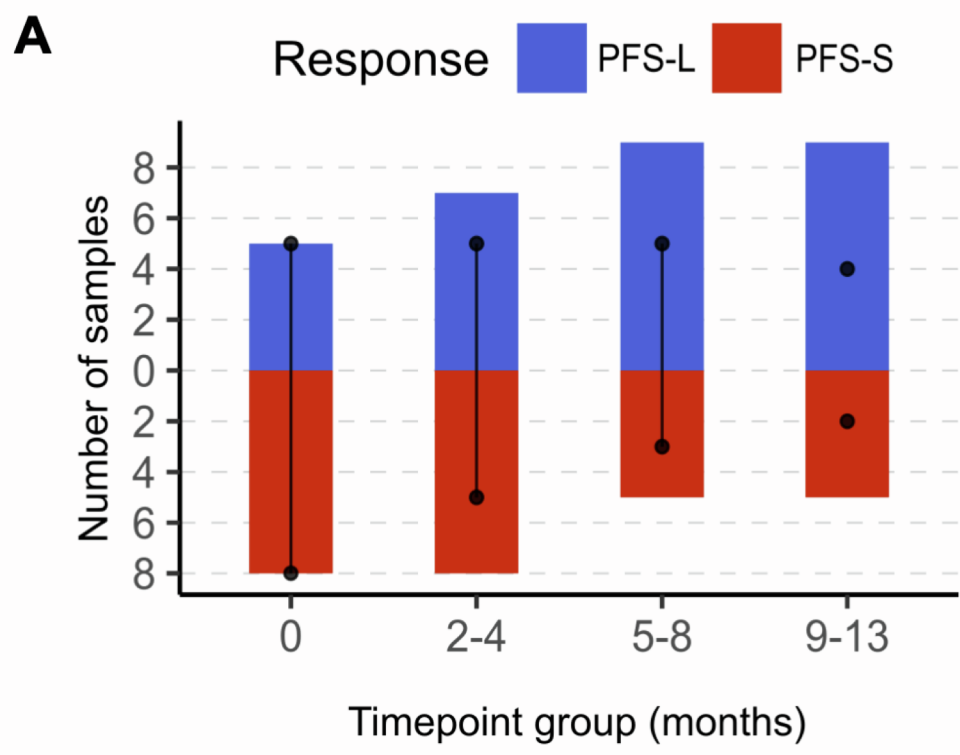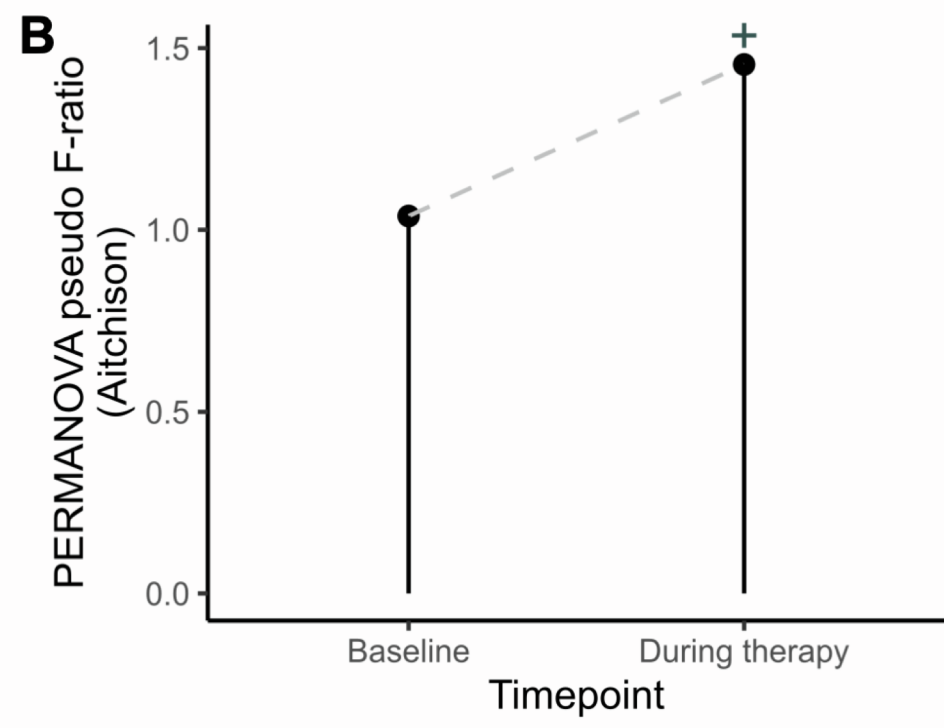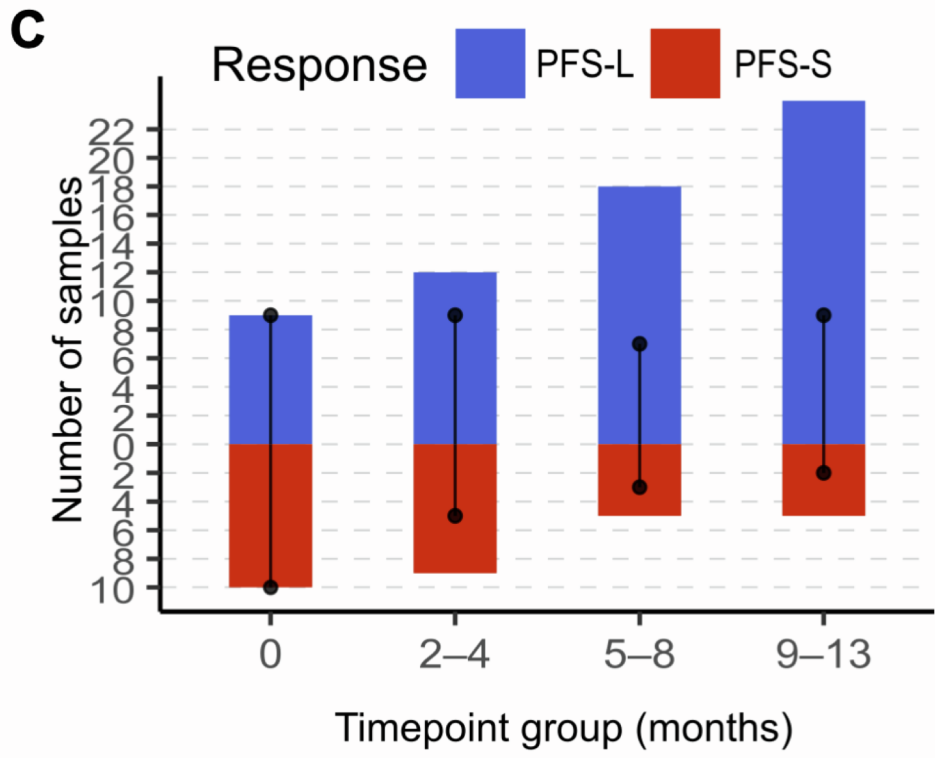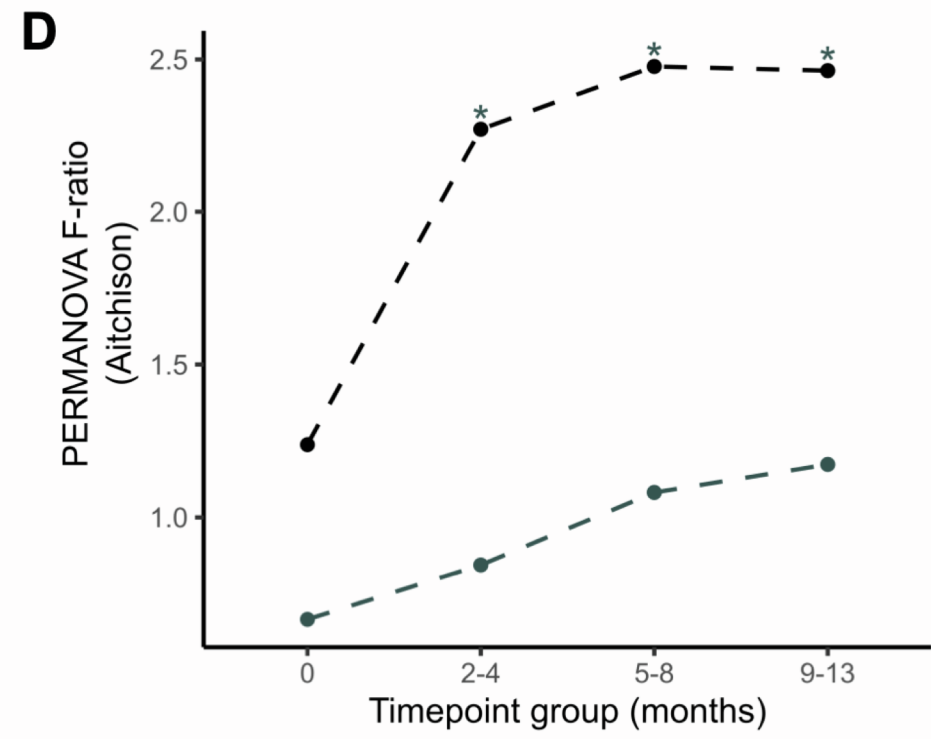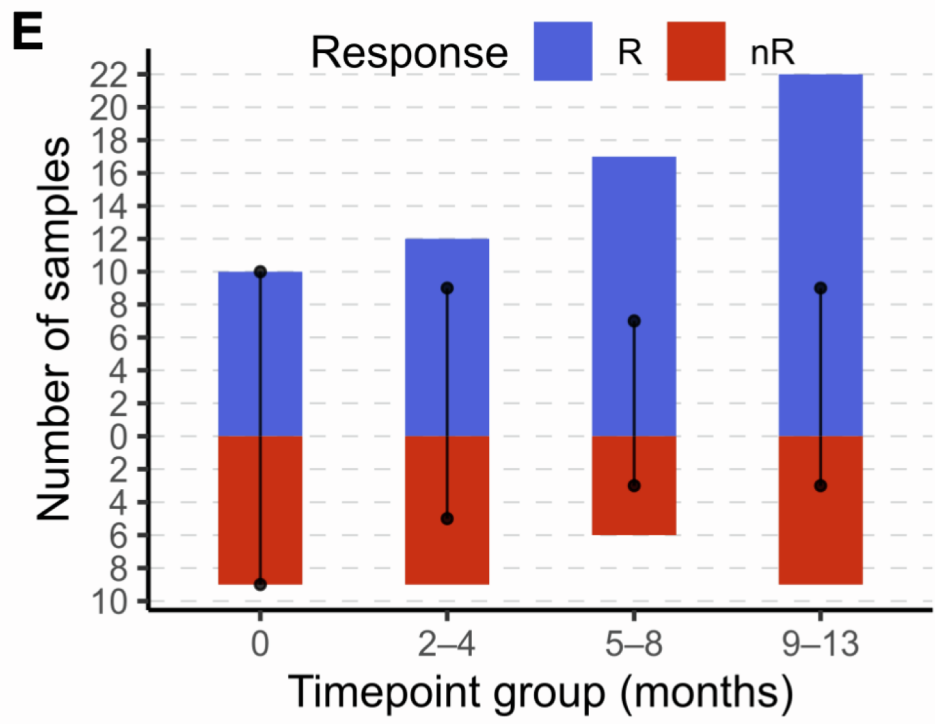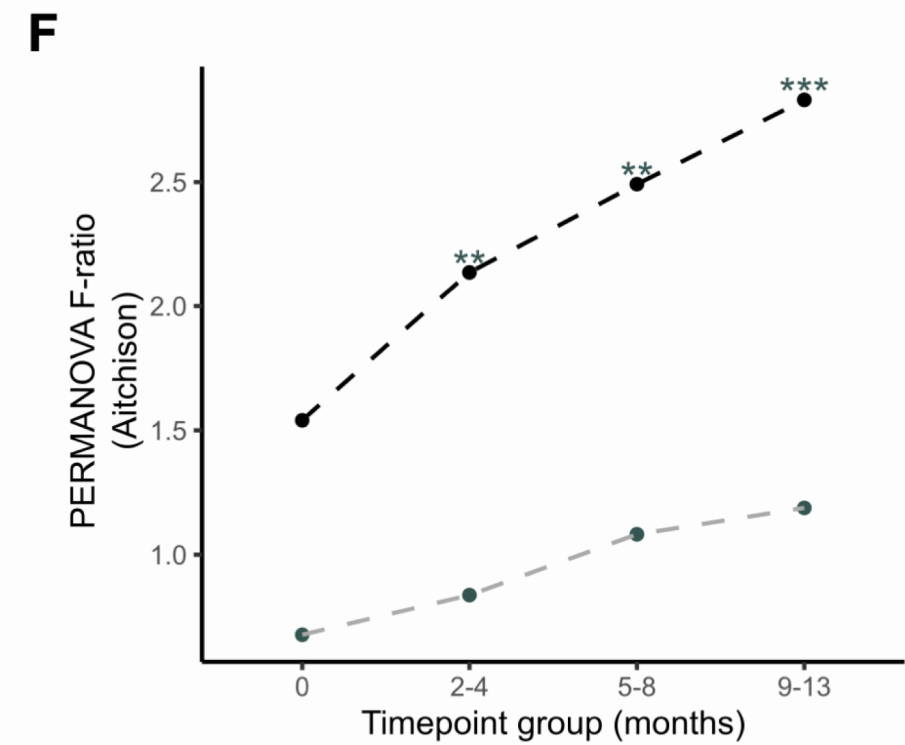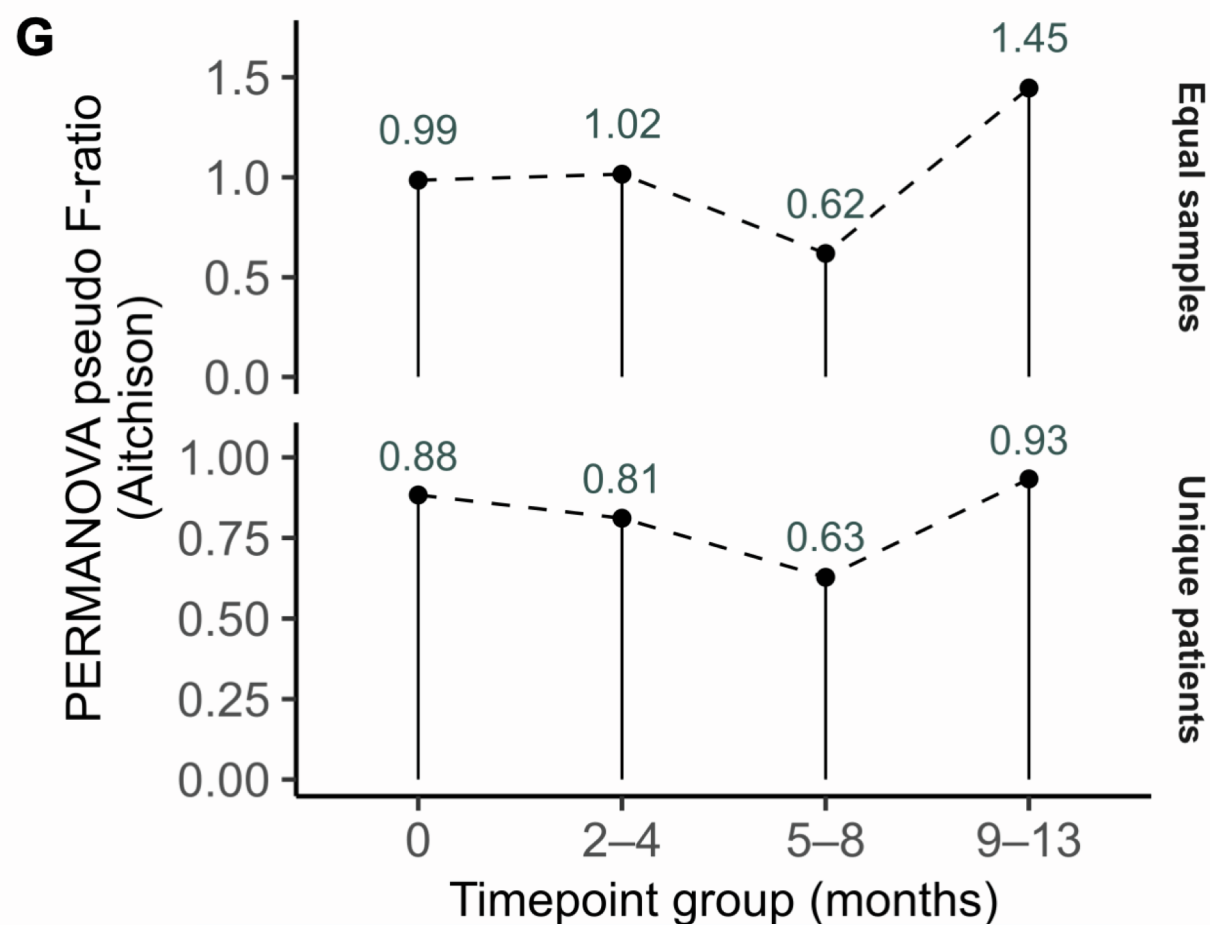

Figure S6

**Figure S6. Patients with melanoma responding differently to anti-PD-1 therapy have progressively different gut microbiome diversity, related to Figure 2.**

**(A)** Frequency distribution of melanoma PFS-L and PFS-S samples across time in aggregated months (0, 2–4, 5–8, 9–13 months of therapy). Inset line segments (black) indicate number of samples from non-redundant patients. Sample tallies are that for Shotgun sequencing. **(B)** Shotgun sequencing Aitchison gut composition difference between PFS-L (PFS > 24 months) and PFS-S (PFS < 24 months) groups compared at baseline (using all baseline samples) and therapy (using unique patient samples at 2–4, 5–8, and 9–13 months). '+' indicates PERMANOVA p-adj (distance~group) at the given timepoint group. **(C)** Frequency distribution of melanoma PFS-L and PFS-S samples across time in aggregated months (0, 2–4, 5–8, 9–13 months of therapy). Inset line segments (black) indicate number of samples from non-redundant patients. Sample tallies are that for 16S sequencing. **(D)** 16S sequencing Aitchison gut composition difference between PFS-L and PFS-S (top, in black) and sequencing batch (bottom, in dark gray), compared from 0, 2–4, 5–8, 9–13. Asterisk indicates PERMANOVA p-adj (distance~group) at the given timepoint group. **(E)** 16S sequencing frequency distribution of melanoma R (RECIST1.1 complete and partial response) and nR (RECIST1.1 stable disease and progressive disease) across time in aggregated months (0, 2–4, 5–8, 9–13 months of therapy). Inset line segments (black) indicate number of samples from non-redundant patients. **(F)** 16S sequencing Aitchison gut composition difference between R and nR (top, in black) and sequencing batch (bottom, in dark gray), compared from 0, 2–4, 5–8, to 9–13. Asterisk indicates PERMANOVA p-adj (distance~group) at the given timepoint group. **(G)** 16S sequencing Aitchison gut composition difference between R and nR, using equal samples across timepoint groups (n=6) (top), and using only unique patient samples (bottom), compared from 0, 2–4, 5–8, to 9–13. Asterisk indicates PERMANOVA p-adj (distance~group) at the given timepoint group.

**Legend:** p-adj<0.001 (\*\*\*), p-adj<0.01 (\*\*), p-adj<0.05 (\*), p-adj<0.10 (+), ns (unannotated).

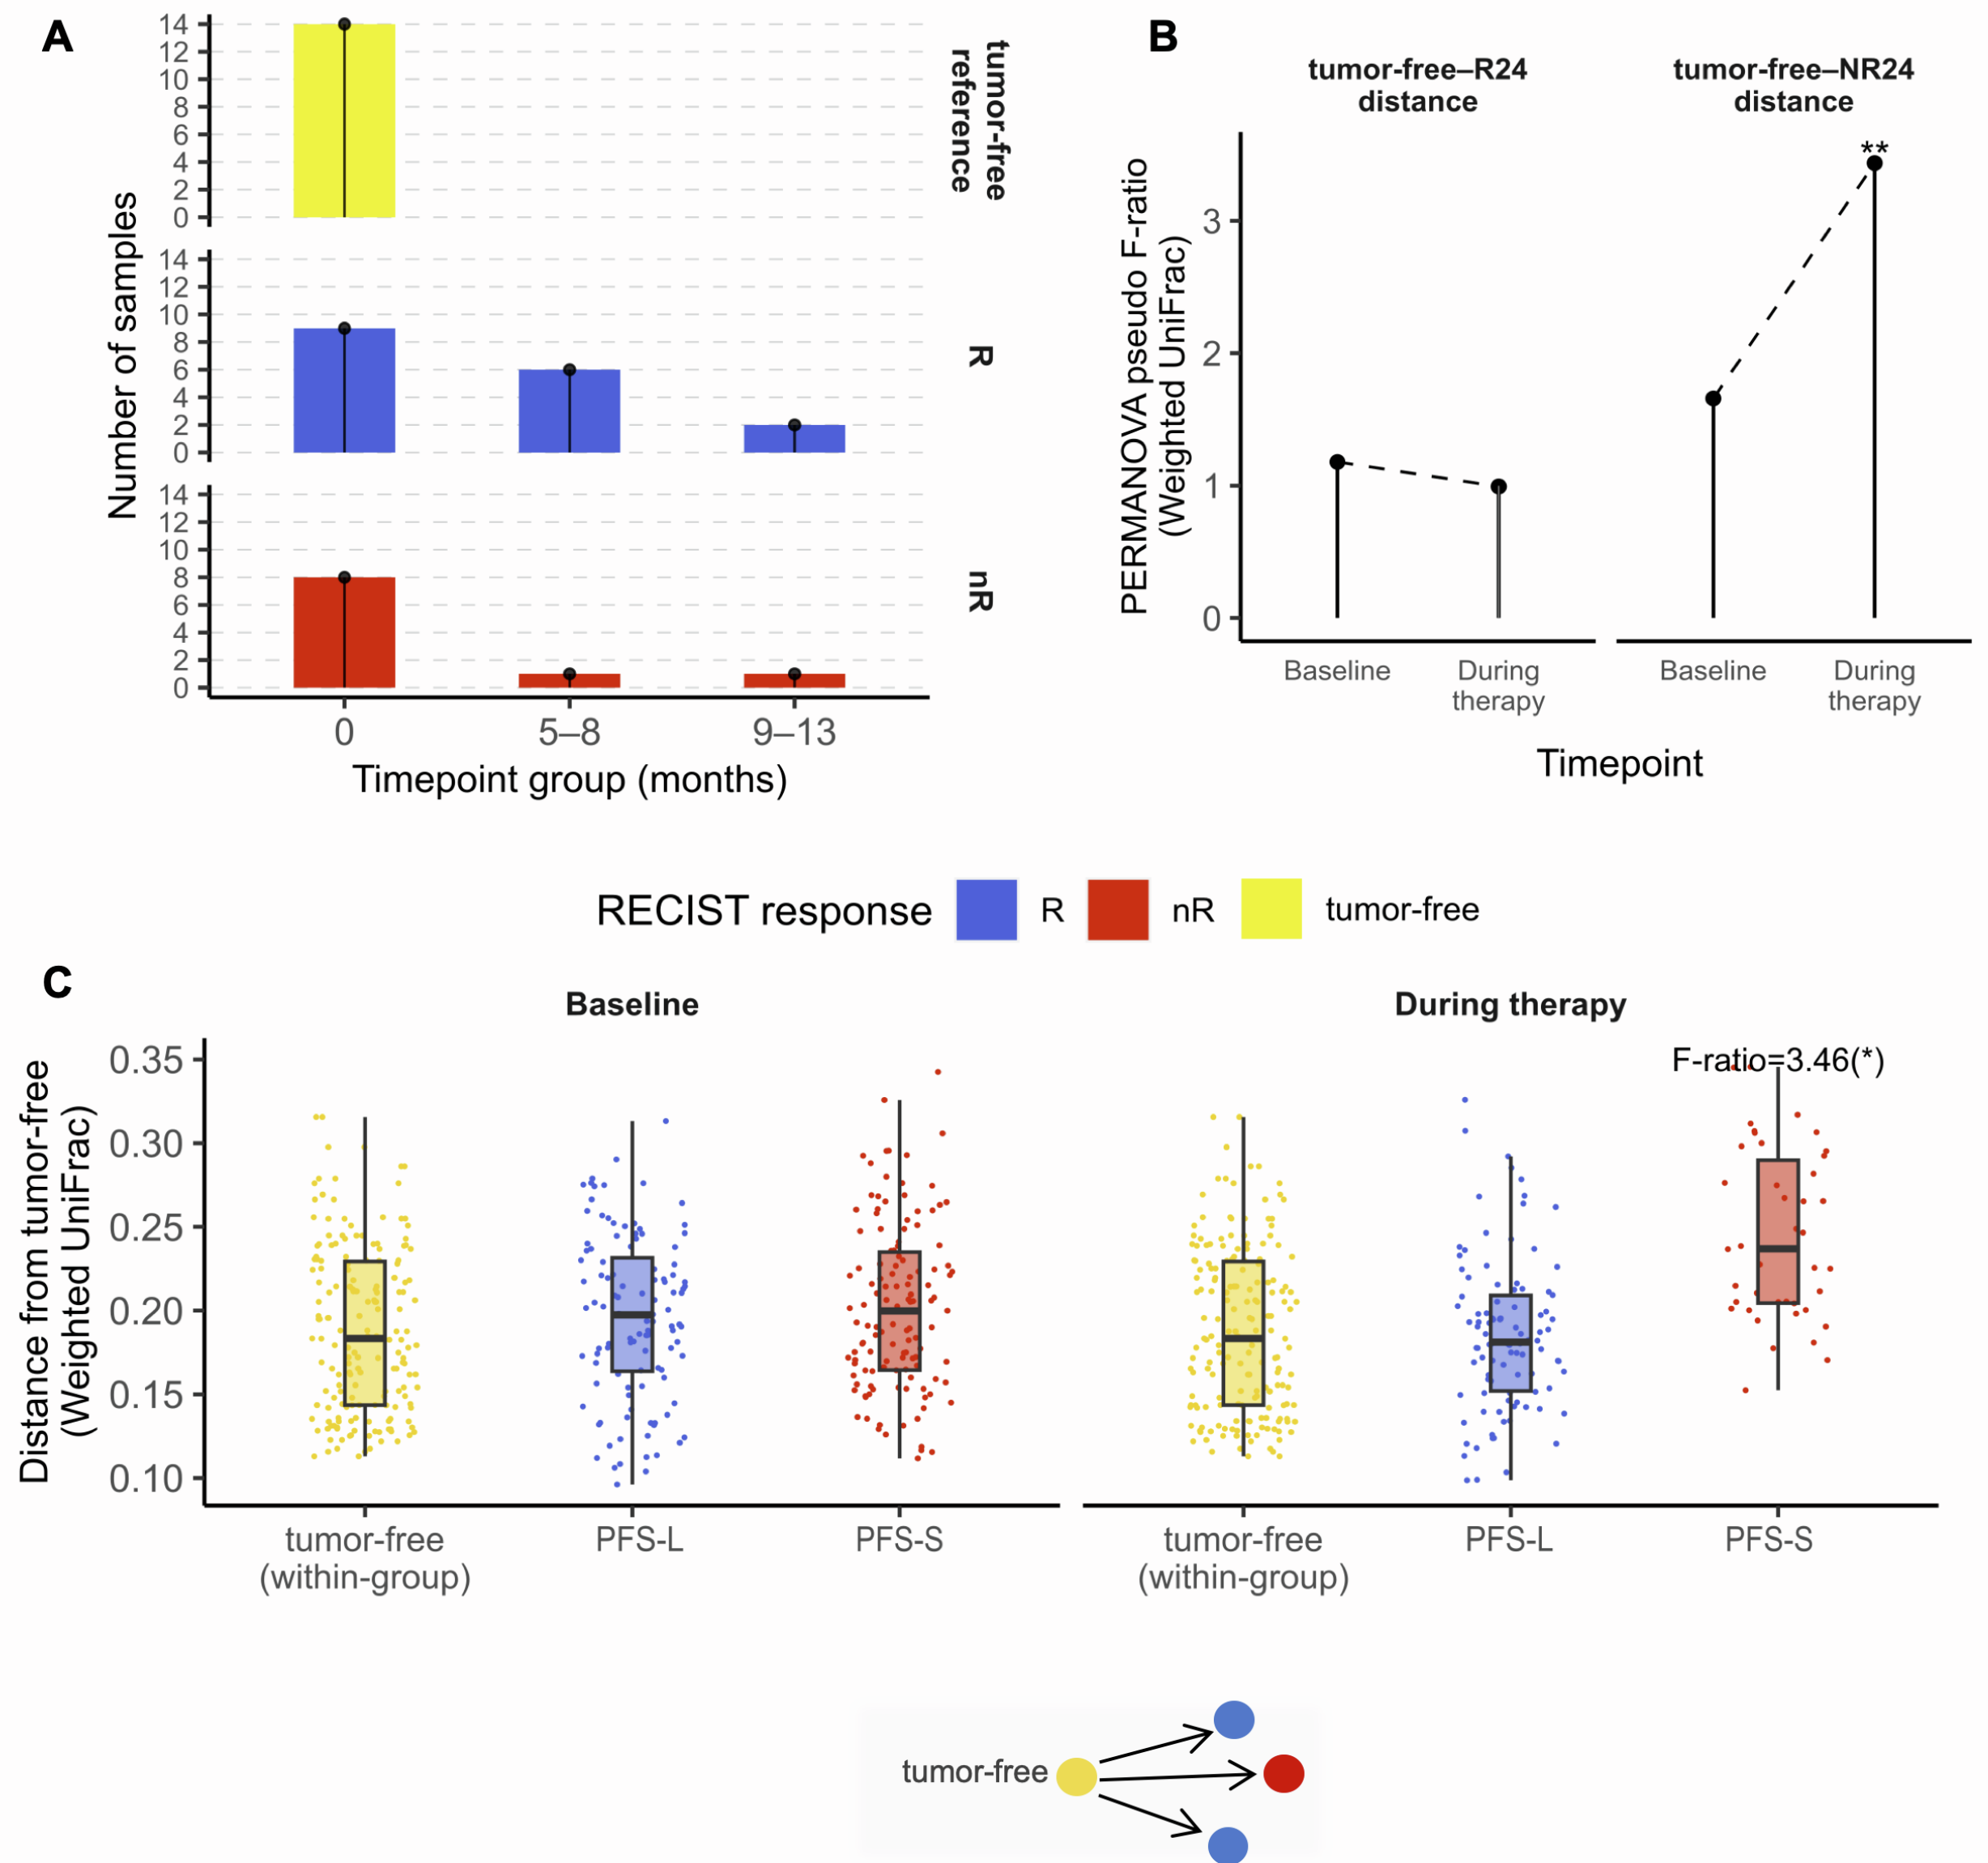

**Figure S7. Gut microbiome stability characterizes response to anti-PD-1 immunotherapy, related to Figure 2.**

(A) Frequency distribution of tumor-free reference, melanoma-PFS-L, and melanoma-PFS-S samples sequenced in one run for tumor-free vs. melanoma comparison. Inset line segments (black) indicate number of samples from non-redundant patients (i.e., samples included at each timepoint group are all non-redundant). (B) Weighted UniFrac beta-diversity difference between tumor-free reference and melanoma-PFS-L and melanoma-PFS-S groups compared at baseline and during therapy. Asterisk indicates PERMANOVA p-adj (distance~group) at the given timepoint group. (C) Sample distances (Weighted UniFrac) from tumor-free group, using all unique patients at baseline, and all unique patients at 5–8 and 9–13 months to represent therapy. Within-group distances of tumor-free reference are shown for comparison. Statistics are from PERMANOVA (distance~group) of inter-sample distances.

**Legend:** p-adj<0.001 (\*\*\*), p-adj<0.01 (\*\*), p-adj<0.05 (\*), ns (unannotated).

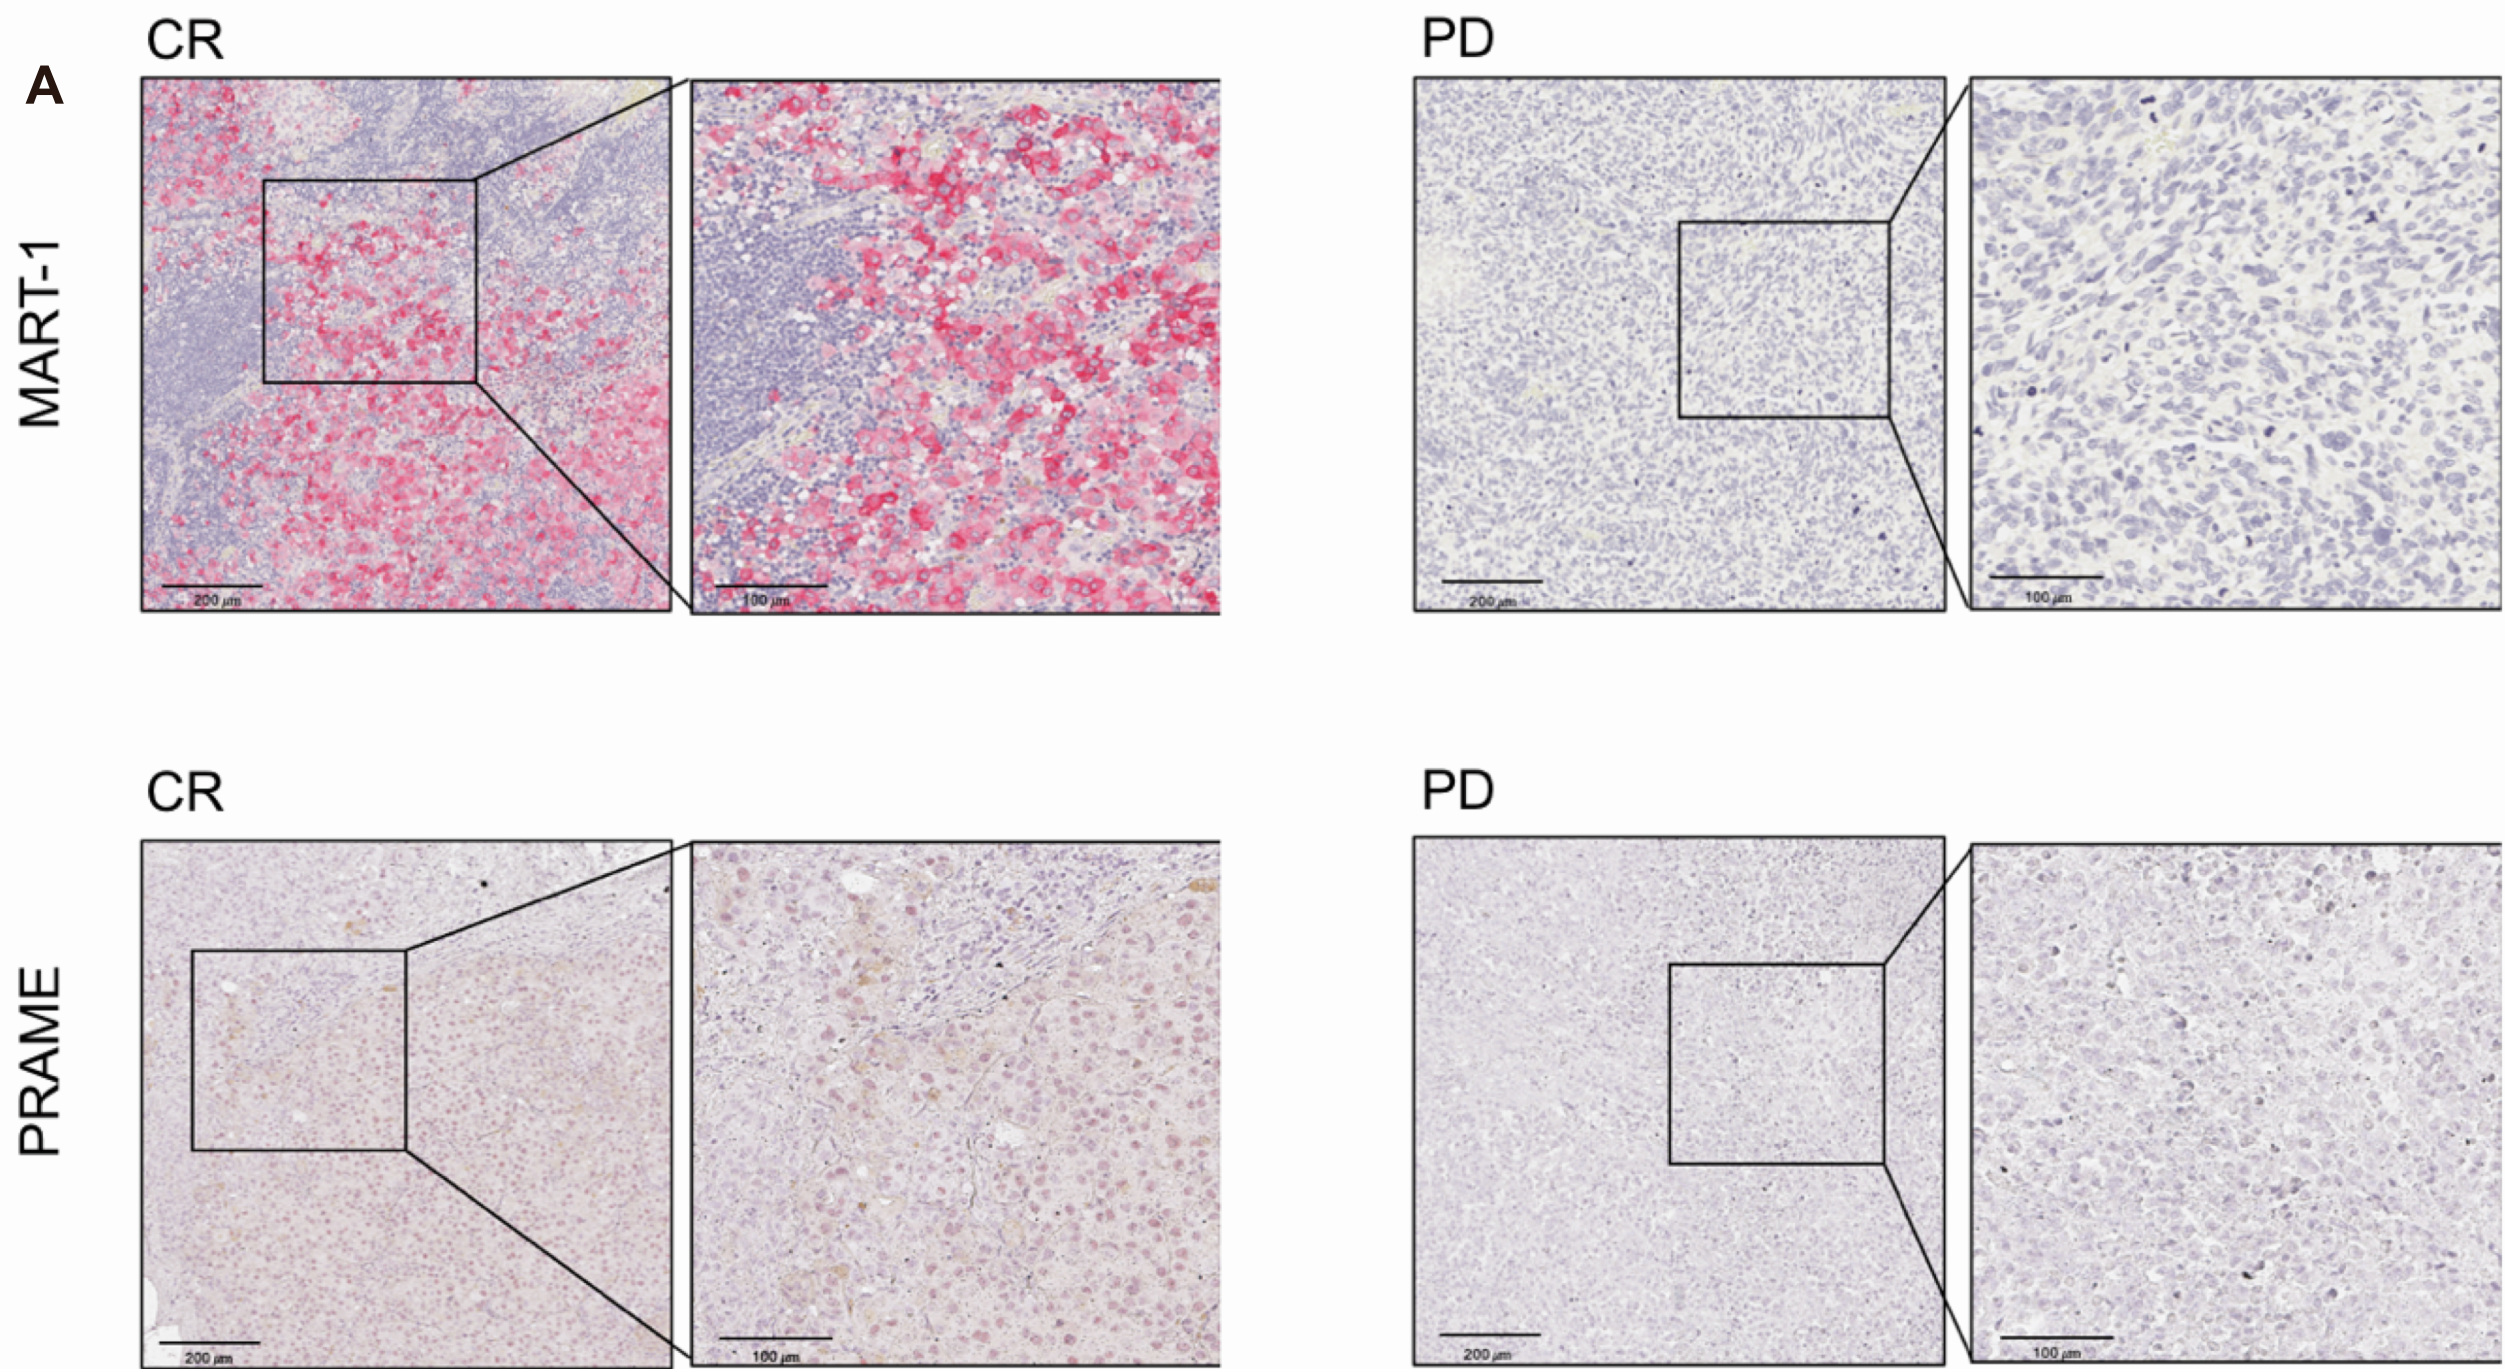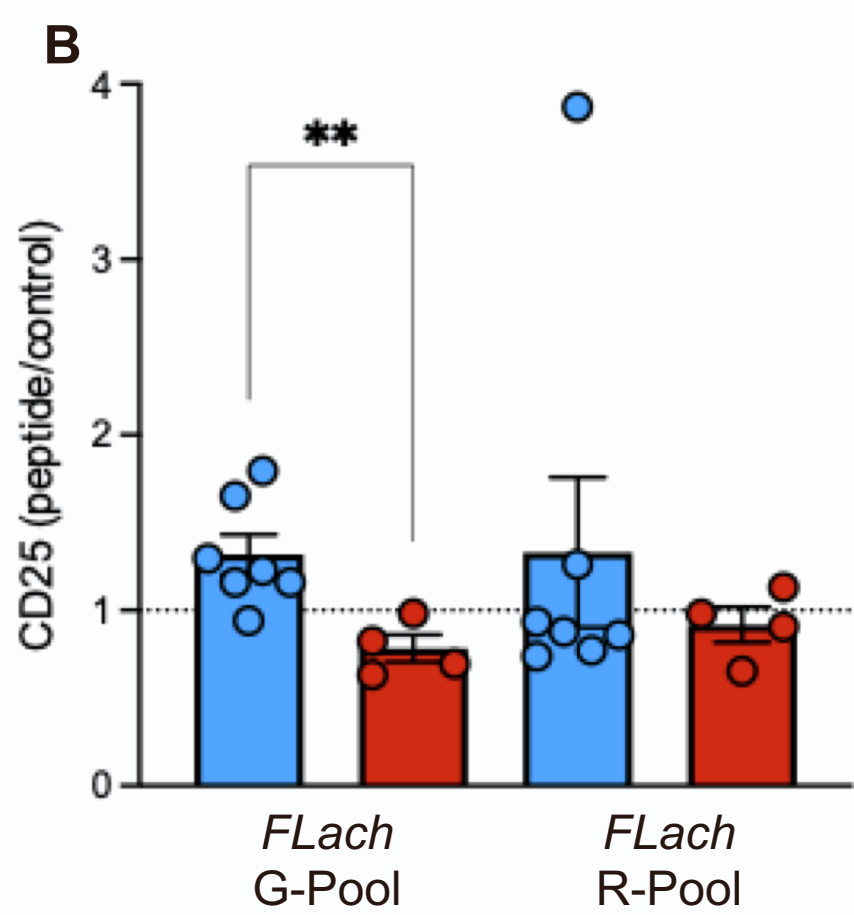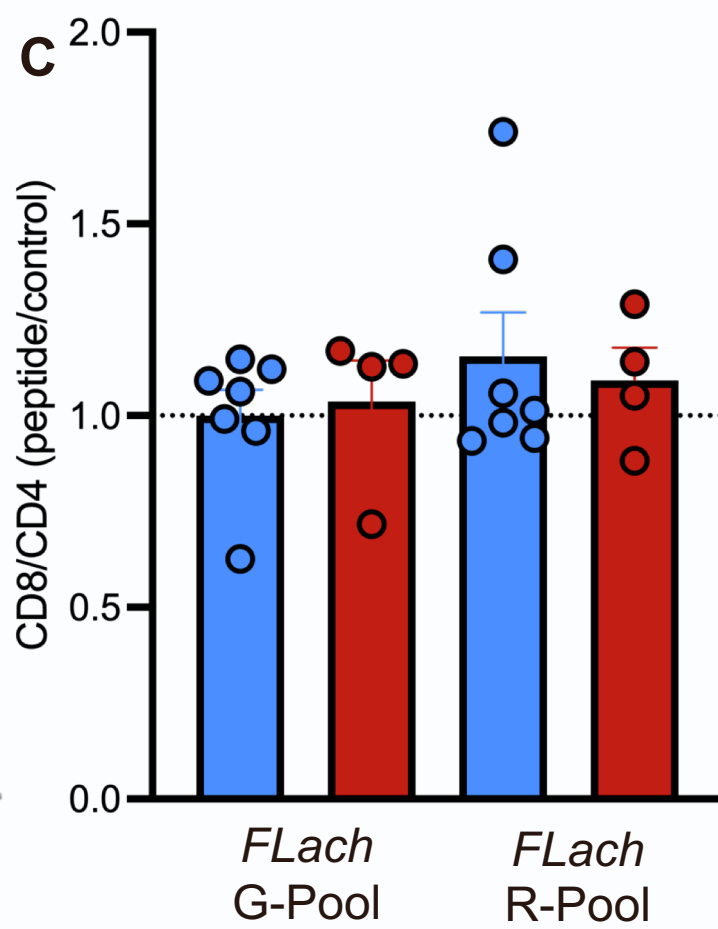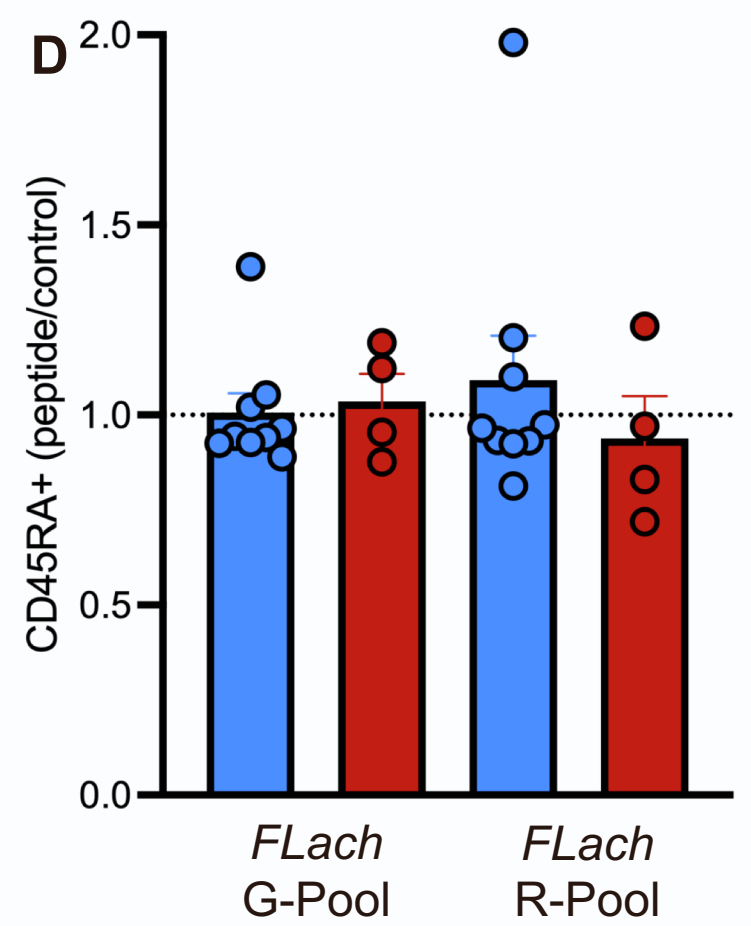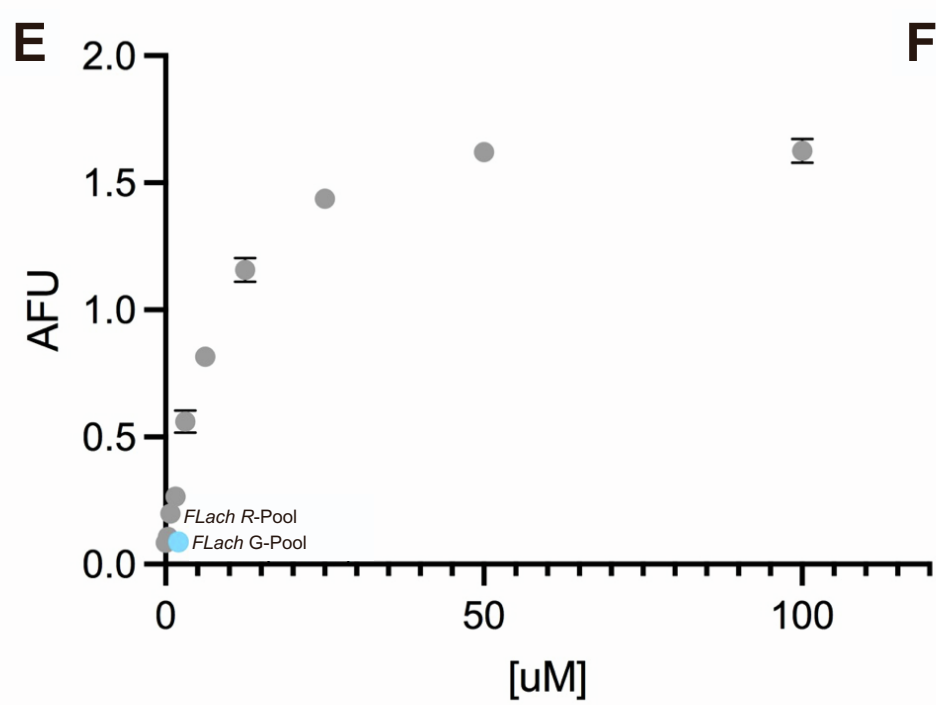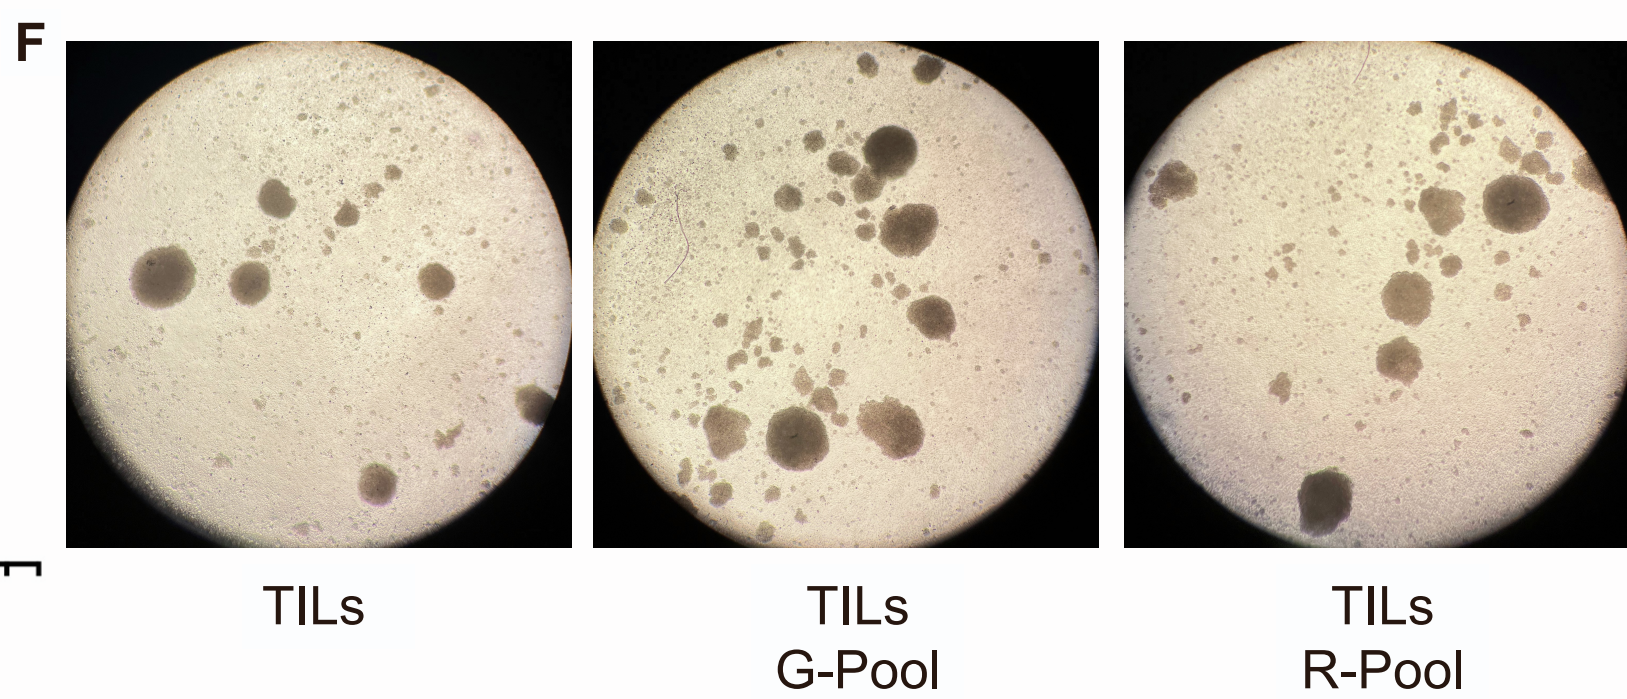

Figure S8

**Figure S8. Tumor and peripheral immune characterization of melanoma patients with different response, related to Figures 3 and 4.** (A) Immunohistochemistry staining of representative CR and PD tumor samples using anti-Melan-A (top) and anti-PRAME (bottom) specific antibodies. (B-E) Flow cytometry analysis of T cell populations in peripheral blood monocyctic cells (PBMC) from patients with melanoma grouped by response to ICI (complete response=4, progressive disease= 2). (B) MFI measurements of CD25 on CD8+ T cells, (C) CD4/CD8 ratio and (D) CD45RA+ CD8+ T cells (normalized on untreated controls) in peripheral blood monocyctic cells (PBMC) from patients with melanoma grouped by response to ICI (responsive=7, non-responsive= 4). (E) Quantification of biologically active flagellin, based on the activation of Toll-like receptor 5 (TLR5) in engineered HEK-Blue™ hTLR5 cells. Absorbance values for flagellin standard curve and *FLach* peptide pools are shown. (F) Representative pictures of tumor infiltrating lymphocytes (TILs) from human melanoma tumors expanded with or without adding the indicated *FLach* peptide pools.

**Legend:** p-adj<0.001 (\*\*\*), p-adj<0.01 (\*\*), p-adj<0.05 (\*), ns (unannotated).

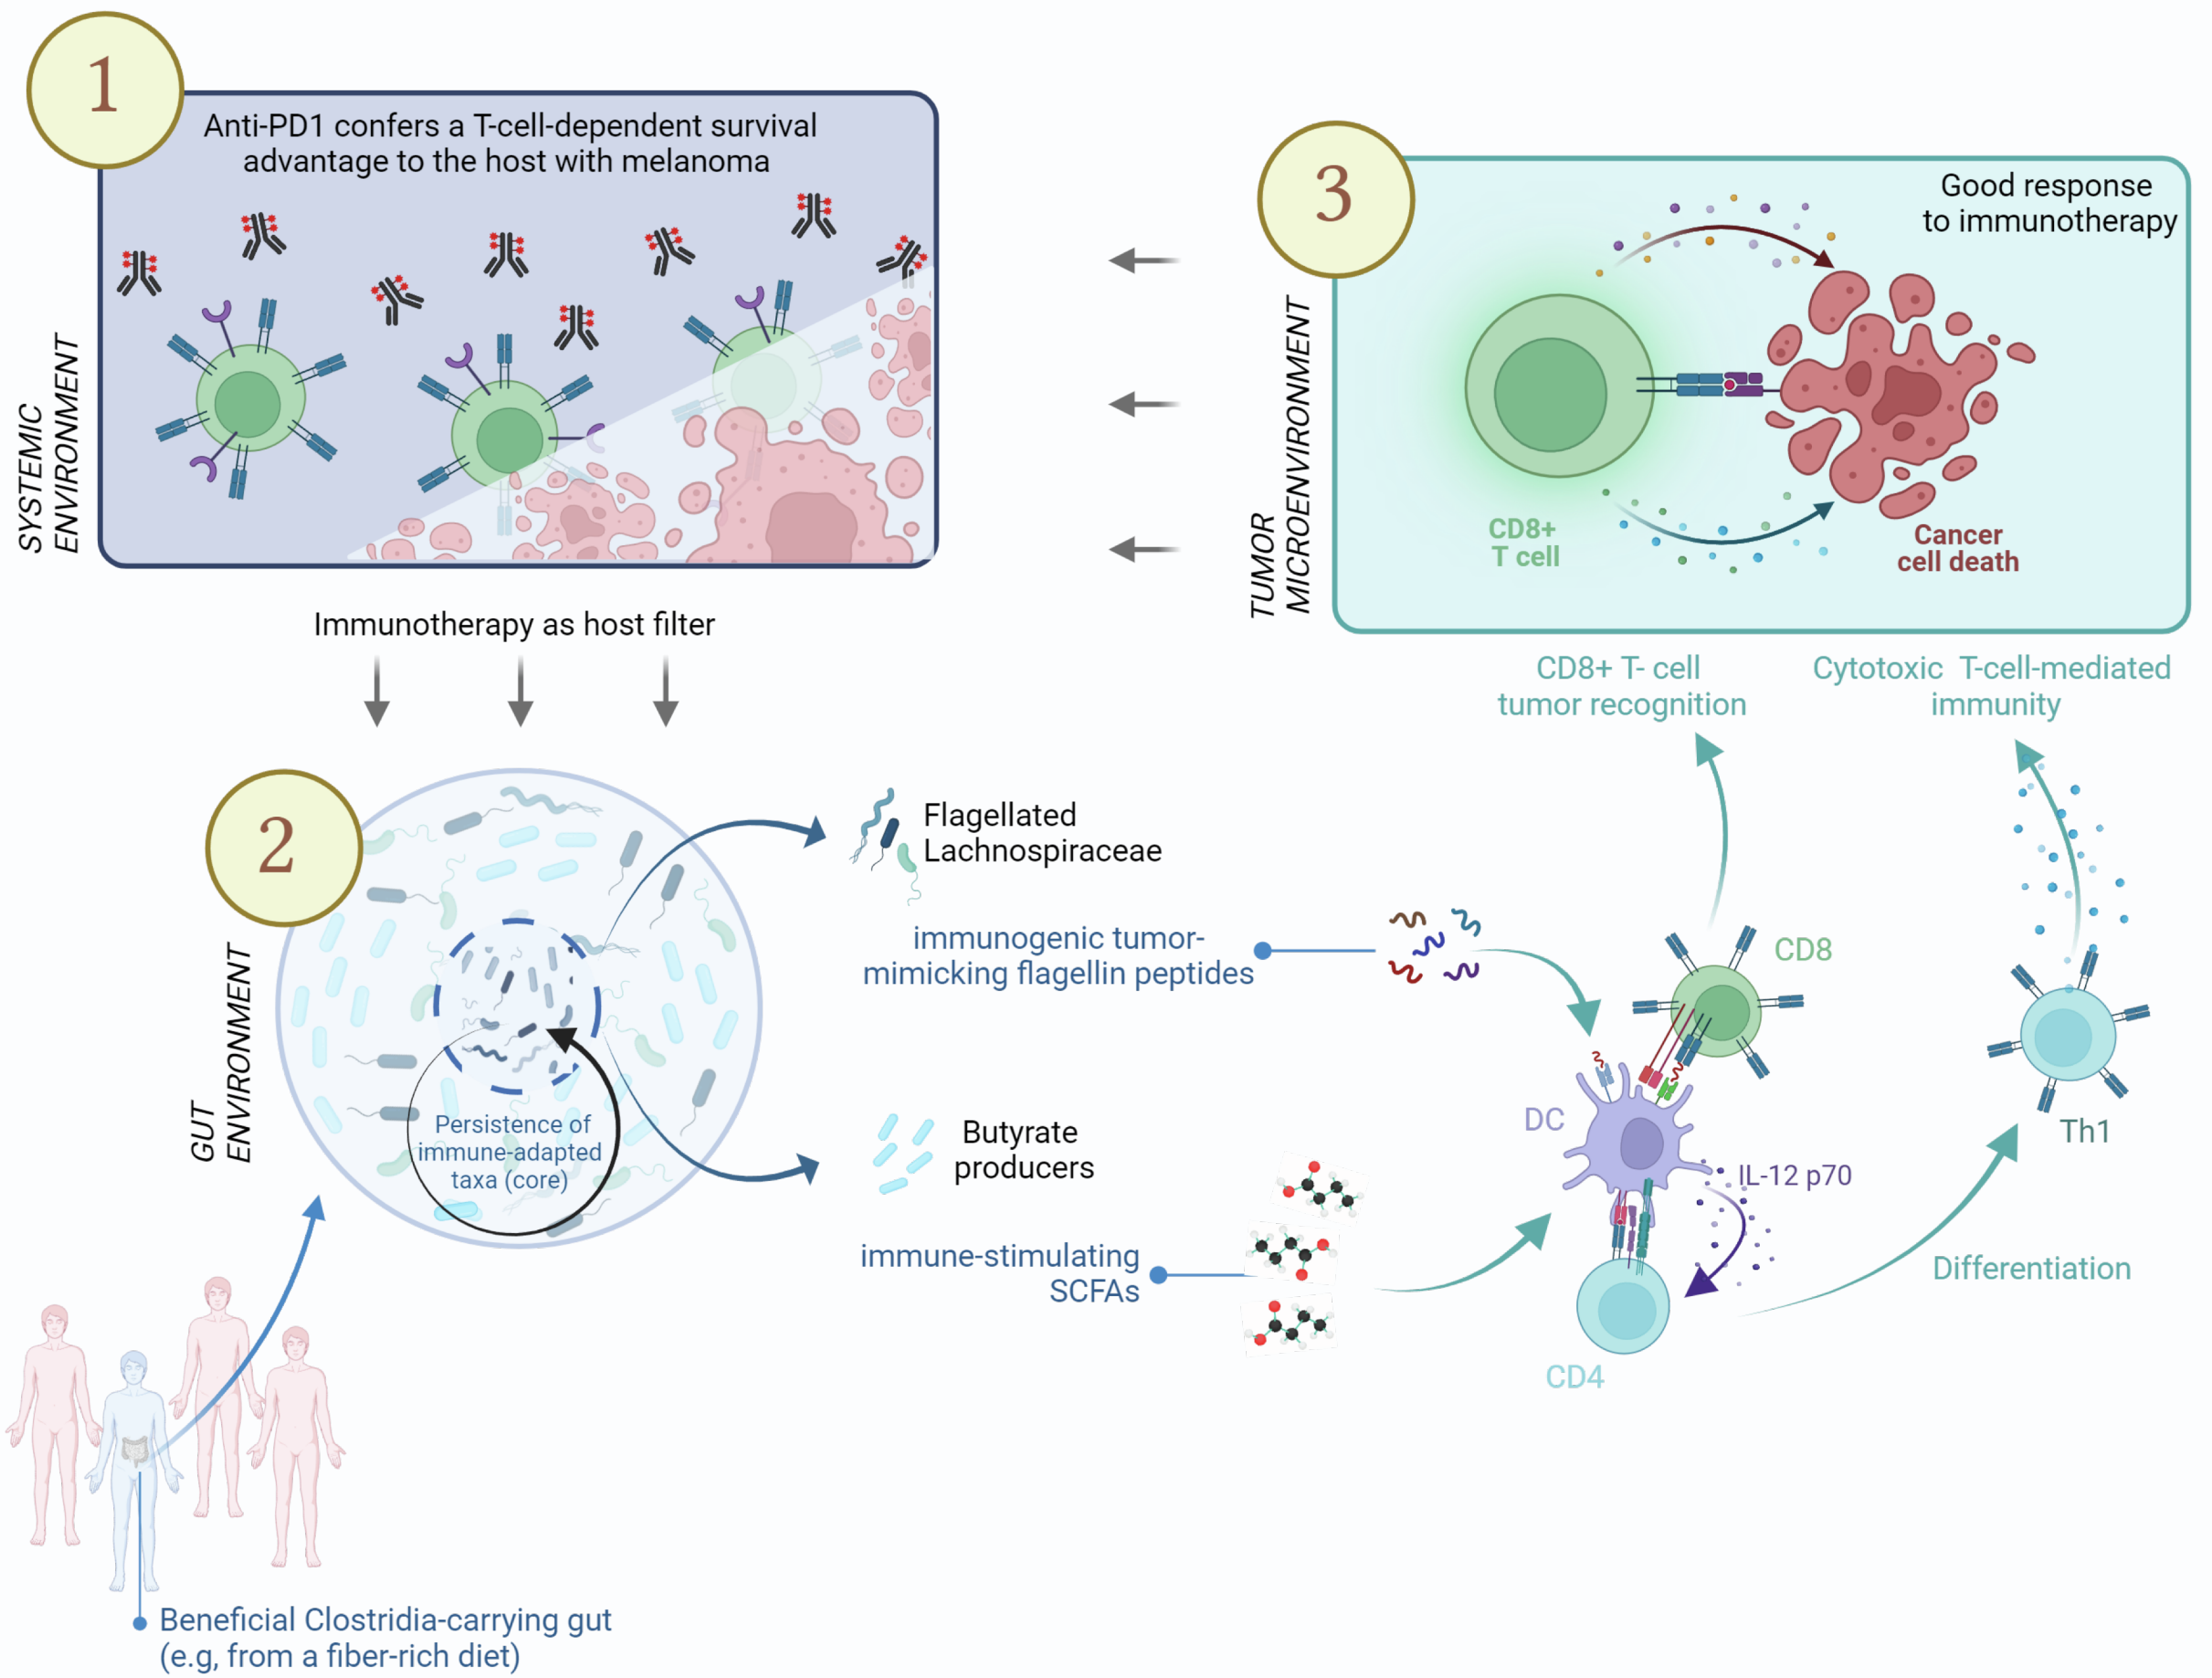

**Figure S9. Clostridia-carrying responder gut, related to Figures 1–4.**

Proposed model by which the gut of immunotherapy-responsive melanoma patients, through the presence of beneficial Clostridia taxa, mediates a T-cell response synergistic to ICI therapy.



| n     | Patient ID  | Sample            | Timepoint (months) |   |   |   |   |   |   |   |   |   |    |    |    | Total n |    |
|-------|-------------|-------------------|--------------------|---|---|---|---|---|---|---|---|---|----|----|----|---------|----|
|       |             |                   | 0                  | 1 | 2 | 3 | 4 | 5 | 6 | 7 | 8 | 9 | 10 | 11 | 12 |         | 13 |
| 1     | IEO.01      | 16S               | x                  | - | - | x | x | x | x | x | x | - | x  | x  | -  | -       | 9  |
|       |             | WGS               | x                  | - | - | x | x | x | x | x | x | - | x  | x  | -  | -       | 9  |
| 2     | IEO.02      | 16S               | x                  | - | - | x | x | - | x | x | - | - | x  | x  | x  | -       | 8  |
|       |             | WGS               | x                  | - | - | x | x | - | x | x | - | - | x  | x  | x  | -       | 8  |
| 3     | IEO.04      | 16S               | x                  | - | x | x | x | x | x | x | x | - | -  | -  | -  | -       | 9  |
|       |             | WGS               | x                  | - | x | x | x | x | - | - | - | - | -  | -  | -  | -       | 5  |
| 4     | IEO.05      | 16S               | -                  | - | - | - | - | - | - | - | - | - | x  | x  | x  | x       | 4  |
|       |             | WGS               | -                  | - | - | - | - | - | - | - | - | - | -  | -  | -  | -       | 0  |
| 5     | IEO.06      | 16S               | -                  | - | - | - | x | - | x | x | - | x | x  | x  | x  | -       | 7  |
|       |             | WGS               | -                  | - | - | - | - | - | - | - | - | - | -  | -  | -  | -       | 0  |
| 6     | IEO.07      | 16S               | -                  | - | - | - | - | - | - | - | - | - | x  | x  | x  | x       | 5  |
|       |             | WGS               | -                  | - | - | - | - | - | - | - | - | - | -  | -  | -  | -       | 0  |
| 7     | IEO.08      | 16S               | x                  | - | - | - | - | - | - | - | - | - | -  | -  | -  | -       | 1  |
|       |             | WGS               | -                  | - | - | - | - | - | - | - | - | - | -  | -  | -  | -       | 0  |
| 8     | IEO.09      | 16S               | x                  | - | x | x | x | - | - | - | - | - | -  | -  | -  | -       | 4  |
|       |             | WGS               | x                  | - | - | x | x | - | - | - | - | - | -  | -  | -  | -       | 3  |
| 9     | IEO.10      | 16S               | x                  | - | - | - | - | - | - | - | - | - | -  | -  | -  | -       | 1  |
|       |             | WGS               | -                  | - | - | - | - | - | - | - | - | - | -  | -  | -  | -       | 0  |
| 10    | IEO.11      | 16S               | x                  | - | - | - | - | - | - | - | - | - | -  | -  | -  | -       | 1  |
|       |             | WGS               | -                  | - | - | - | - | - | - | - | - | - | -  | -  | -  | -       | 0  |
| 11    | IEO.12      | 16S               | -                  | - | - | - | - | - | - | - | - | - | -  | x  | -  | -       | 1  |
|       |             | WGS               | -                  | - | - | - | - | - | - | - | - | - | -  | -  | -  | -       | 0  |
| 12    | IEO.14      | 16S               | x                  | - | x | - | - | - | - | - | - | - | -  | -  | -  | -       | 2  |
|       |             | WGS               | -                  | - | - | - | - | - | - | - | - | - | -  | -  | -  | -       | 0  |
| 13    | IEO.15      | 16S               | x                  | - | x | - | - | - | - | - | - | - | -  | -  | -  | -       | 2  |
|       |             | WGS               | -                  | - | - | - | - | - | - | - | - | - | -  | -  | -  | -       | 0  |
| 14    | INT.FGP-001 | 16S               | x                  | - | - | x | - | - | x | - | x | - | -  | x  | -  | x       | 6  |
|       |             | WGS               | x                  | - | - | x | - | - | x | - | x | - | -  | x  | -  | x       | 6  |
|       |             | white blood cells | x                  | - | - | x | - | - | x | - | x | - | -  | x  | -  | x       | 6  |
|       |             | serum             | -                  | - | x | - | x | - | x | - | - | - | -  | x  | -  | -       | 4  |
| 15    | INT.FGP-002 | 16S               | x                  | - | - | x | - | x | - | - | x | - | x  | -  | x  | -       | 6  |
|       |             | WGS               | x                  | - | - | x | - | x | - | - | x | - | x  | -  | x  | -       | 6  |
|       |             | white blood cells | x                  | - | - | x | - | x | - | - | x | - | x  | -  | x  | -       | 6  |
|       |             | serum             | x                  | - | x | - | x | - | - | x | - | x | -  | -  | -  | -       | 5  |
| 16    | INT.FGP-005 | 16S               | x                  | - | - | - | - | - | - | - | - | - | -  | -  | -  | -       | 1  |
|       |             | WGS               | x                  | - | - | - | - | - | - | - | - | - | -  | -  | -  | -       | 1  |
|       |             | white blood cells | x                  | - | - | - | - | - | - | - | - | - | -  | -  | -  | -       | 1  |
|       |             | serum             | -                  | - | - | - | - | - | - | - | - | - | -  | -  | -  | -       | 0  |
| 17    | INT.FGP-006 | 16S               | x                  | - | - | x | - | - | x | - | x | - | x  | -  | x  | -       | 6  |
|       |             | WGS               | x                  | - | - | x | - | - | x | - | x | - | x  | -  | x  | -       | 6  |
|       |             | white blood cells | x                  | - | - | x | - | - | x | - | x | - | x  | -  | x  | -       | 6  |
|       |             | serum             | x                  | - | x | - | - | x | - | x | - | x | -  | x  | -  | -       | 6  |
| 18    | INT.FGP-007 | 16S               | x                  | - | - | - | x | - | x | - | - | - | -  | -  | -  | -       | 3  |
|       |             | WGS               | x                  | - | - | - | x | - | x | - | - | - | -  | -  | -  | -       | 3  |
|       |             | white blood cells | x                  | - | - | - | - | - | x | - | - | - | -  | -  | -  | -       | 2  |
|       |             | serum             | x                  | - | - | x | - | x | - | - | - | - | -  | -  | -  | -       | 3  |
| 19    | INT.FGP-009 | 16S               | x                  | - | x | - | x | - | x | - | - | - | x  | -  | x  | -       | 7  |
|       |             | WGS               | x                  | - | x | - | x | - | x | - | - | - | x  | -  | x  | -       | 7  |
|       |             | white blood cells | x                  | - | x | - | x | - | x | - | x | - | -  | -  | -  | -       | 5  |
|       |             | serum             | x                  | x | - | x | - | x | - | x | - | - | x  | -  | x  | -       | 7  |
| 20    | INT.FGP-010 | 16S               | x                  | - | - | - | - | - | - | - | - | - | -  | -  | -  | -       | 1  |
|       |             | WGS               | x                  | - | - | - | - | - | - | - | - | - | -  | -  | -  | -       | 1  |
|       |             | white blood cells | -                  | - | - | - | - | - | - | - | - | - | -  | -  | -  | -       | 0  |
|       |             | serum             | x                  | - | - | - | - | - | - | - | - | - | -  | -  | -  | -       | 1  |
| 21    | INT.FGP-011 | 16S               | x                  | - | x | - | x | - | x | - | - | x | -  | x  | -  | x       | 7  |
|       |             | WGS               | x                  | - | x | - | x | - | x | - | - | x | -  | x  | -  | x       | 7  |
|       |             | white blood cells | -                  | - | - | - | - | - | - | - | - | - | -  | -  | -  | -       | 0  |
|       |             | serum             | x                  | x | - | x | - | x | - | - | x | - | x  | -  | x  | -       | 7  |
| 22    | INT.FGP-013 | 16S               | x                  | - | - | - | - | - | - | - | - | - | -  | -  | -  | -       | 1  |
|       |             | WGS               | x                  | - | - | - | - | - | - | - | - | - | -  | -  | -  | -       | 1  |
|       |             | white blood cells | x                  | - | - | - | - | - | - | - | - | - | -  | -  | -  | -       | 1  |
|       |             | serum             | x                  | - | - | - | - | - | - | - | - | - | -  | -  | -  | -       | 1  |
| 23    | INT.FGP-014 | 16S               | x                  | - | x | - | - | - | - | - | - | - | -  | -  | -  | -       | 2  |
|       |             | WGS               | x                  | - | x | - | - | - | - | - | - | - | -  | -  | -  | -       | 2  |
|       |             | white blood cells | x                  | - | x | - | - | - | - | - | - | - | -  | -  | -  | -       | 2  |
|       |             | serum             | x                  | x | - | - | - | - | - | - | - | - | -  | -  | -  | -       | 2  |
| Total | Total       | 16S               | 19                 | 0 | 7 | 7 | 8 | 3 | 9 | 4 | 6 | 4 | 7  | 8  | 7  | 5       | 94 |
|       |             | WGS               | 14                 | 0 | 4 | 7 | 7 | 3 | 7 | 2 | 5 | 1 | 4  | 5  | 3  | 3       | 65 |
|       |             | white blood cells | 8                  | 0 | 2 | 3 | 1 | 1 | 4 | 0 | 4 | 0 | 2  | 2  | 2  | 2       | 31 |
|       |             | serum             | 8                  | 3 | 3 | 3 | 2 | 4 | 1 | 3 | 1 | 2 | 2  | 2  | 2  | -       | 36 |

**Table S1. Breakdown of samples collected from each patient across timepoints, related to Figures 1 and 2.**

Fecal samples were processed for 16S and whole genome sequencing (WGS), whole blood samples for white blood cell count, and serum samples for soluble factor analysis.

| <b>Demographics</b>        | <b>n (tot=14)</b>   | <b>%</b> |
|----------------------------|---------------------|----------|
| <b>Age, years (median)</b> | 42 (29-54)          |          |
| <b>Sex</b>                 |                     |          |
| <b>Male</b>                | 7                   | 50%      |
| <b>Female</b>              | 7                   | 50%      |
| <b>BMI, kg/m2 (median)</b> | 22.21 (18.96-32.74) |          |

**Table S2. Tumor-free summary demographics, related to Figure 2.**  
Tumor-free cohort used for longitudinal comparison with melanoma patients from this study.

| n | KO ID  | Annotation                           | Associated group | LM coefficient | p-adj   |
|---|--------|--------------------------------------|------------------|----------------|---------|
| 1 | K08168 | MFS transporter                      | CR               | 3.00           | 0.00188 |
| 2 | K11263 | acetyl-CoA/propionyl-CoA carboxylase | CR               | 3.20           | 0.00188 |
| 3 | K18120 | 4-hydroxybutyrate dehydrogenase      | CR               | 2.43           | 0.00188 |
| 4 | K09705 | hypothetical protein                 | CR               | 3.06           | 0.00197 |

**Table S3. Response-associated metagenome functions, related to Figure 1.**

Significant KEGG orthologs (KOs) associated with complete response (CR) at late therapy (p-adj < 0.05).

| n  | Bacterial flagellin marker | log2FC | Percentile rank | Organism                          |
|----|----------------------------|--------|-----------------|-----------------------------------|
| 1  | UniRef90_A0A0M6WP36        | 19.58  | 100             | Roseburia inulinivorans           |
| 2  | UniRef90_C0FQ31            | 19.56  | 99              | Roseburia inulinivorans DSM 16841 |
| 3  | UniRef90_A0A127SWS0        | 19.26  | 98              | uncultured bacterium              |
| 4  | UniRef90_C0FQ36            | 19,093 | 97              | Roseburia inulinivorans DSM 16841 |
| 5  | UniRef90_A0A396AI63        | 19,092 | 96              | Roseburia inulinivorans           |
| 6  | UniRef90_A0A0M6WMV3        | 19,087 | 95              | Roseburia inulinivorans           |
| 7  | UniRef90_A0A0M6WD36        | 18.69  | 94              | Roseburia inulinivorans           |
| 8  | UniRef90_D4KYR7            | 18.66  | 93              | Roseburia intestinalis XB6B4      |
| 9  | UniRef90_R6VY20            | 18.62  | 92              | Clostridium sp. CAG:91            |
| 10 | UniRef90_A0A351R0D5        | 18.57  | 91              | Roseburia sp.                     |
| 11 | UniRef90_A0A0M6WBR8        | 18.49  | 90              | Roseburia inulinivorans           |
| 12 | UniRef90_A0A0M6WYS8        | 18.34  | 89              | Roseburia inulinivorans           |
| 13 | UniRef90_R6EJ07            | 18.25  | 88              | Firmicutes bacterium CAG:65       |
| 14 | UniRef90_R6VQ94            | 18.17  | 87              | Clostridium sp. CAG:91            |

**Table S4. Candidate complete response (CR) markers, related to Figure 1.**  
Top CR-associated flagellin gene families (UniRef90).

| n | Identity (UniRef90)                             | Peptide       | HLA         | Affinity | TAA match       | Peptide   | HLA         | Affinity | Strong binding (SB) | Pool    |
|---|-------------------------------------------------|---------------|-------------|----------|-----------------|-----------|-------------|----------|---------------------|---------|
| 1 | <a href="#">tr_A0A0M6WD36_A</a>                 | KMSYEDIE<br>L | HLA-A*02:01 | 71.69    | secernin 1      | KMDAEHPEL | HLA-A*02:01 | 33.52    | Yes                 | FLach-G |
| 2 | <a href="#">tr_A0A0M6WMV3_A</a>                 | MPKDGAA<br>FI | HLA-B*07:02 | 93.13    | Melan-A/MART-1  | MPREDAHFI | HLA-B*07:02 | 64.99    | Yes                 |         |
| 3 | <a href="#">tr_A0A0M6WP36</a>                   | GLDALNNL<br>L | HLA-A*02:01 | 51.79    | PRAME           | VLDGLDVLL | HLA-A*02:01 | 24.52    | Yes                 |         |
|   | <a href="#">tr_A0A0M6WP36</a>                   | GLDALNNL<br>L | HLA-A*02:01 | 51.79    | PAP             | ALDVYNGLL | HLA-A*02:01 | 241.11   | Yes                 |         |
| 1 | <a href="#">tr_A0A0M6WYS8_A</a>                 | ALNETSAI<br>L | HLA-A*02:01 | 67.47    | MAGE-A1         | ALAETSYVK | HLA-A*02:01 | 10808.84 | No                  | FLach-R |
| 2 | <a href="#">tr_A0A351R0D5_A</a>                 | ILAQAGQS<br>M | HLA-B*15:01 | 32.57    | N-ras           | ILDTAGREE | HLA-B*15:01 | 17909.95 | No                  |         |
| 3 | <a href="#">tr_A0A396AI63_A</a>                 | NEFNADLL<br>M | HLA-B*40:01 | 55.77    | CEA             | IYPNASLLI | HLA-B*40:01 | 29590.65 | No                  |         |
| 4 | <a href="#">tr_R6EJ07_R6EJ0</a>                 | TEFNGQK<br>LL | HLA-B*40:01 | 24.94    | alpha-actinin-4 | IASNGVKLV | HLA-B*40:01 | 32748.64 | No                  |         |
| 5 | <a href="#">tr_R6EJ07_R6EJ0/tr_R6VY20_R6VY2</a> | SVRGRLG<br>AF | HLA-B*15:01 | 66.44    | NY-ESO-1/LAGE-2 | GGRGPRGAG | HLA-B*15:01 | 29085.32 | No                  |         |
| 6 | <a href="#">tr_R6VQ94_R6VQ9</a>                 | FPELKHFT<br>M | HLA-B*08:01 | 41.6     | NY-ESO-1/LAGE-2 | GVLLKEFTV | HLA-B*08:01 | 7887.94  | No                  |         |
|   | <a href="#">tr_R6VQ94_R6VQ9</a>                 | FPELKHFT<br>M | HLA-B*08:01 | 41.6     | MAGE-A3         | VAELVHFLI | HLA-B*08:01 | 10188    | No                  |         |
| 7 | <a href="#">tr_A0A351R0D5_A</a>                 | ILAQAGQS<br>M | HLA-B*15:01 | 32.57    | N-ras           | ILDTAGREE | HLA-B*15:01 | 32728.81 | No                  |         |

**Table S7. Breakdown of FLach peptide pool, related to Figures 3 and 4.**

List of peptides that comprise the FLach-G (green) and FLach-R (red) pool that were used for the functional validation experiments.

| Cohort details                            | Baruch et al., 2021                                                                                                                                                                                                                              | Davar et al., 2021                                                   | Routy et al., 2023                                                                                                                                                  | Bjork et al., 2024                                                    |
|-------------------------------------------|--------------------------------------------------------------------------------------------------------------------------------------------------------------------------------------------------------------------------------------------------|----------------------------------------------------------------------|---------------------------------------------------------------------------------------------------------------------------------------------------------------------|-----------------------------------------------------------------------|
| <b>Treatment description</b>              | FMT+anti-PD1 on anti-PD1 refractory patients                                                                                                                                                                                                     | FMT+anti-PD1 on anti-PD1 refractory patients                         | FMT+anti-PD1 on anti-PD1 naive patients                                                                                                                             | anti-PD1 on anti-PD1 naive patients                                   |
| <b>Disease type</b>                       | melanoma                                                                                                                                                                                                                                         | melanoma                                                             | melanoma                                                                                                                                                            | melanoma                                                              |
| <b>Donor</b>                              | CR ( $\geq$ 12 m.) (n=2)                                                                                                                                                                                                                         | Durable PR ( $\geq$ 24 m.) (n=3) /CR ( $\geq$ 12 m.) (n=4)           | Healthy male (BMI 18.5-30, w/ exclusion criteria for disease, risk, or infection) (n=3)                                                                             | NA                                                                    |
| <b>Recipient</b>                          | Progressor to anti-PD1 (n=10)                                                                                                                                                                                                                    | Progressive disease to anti-PD1/ anti-PD1 + anti-CTLA-4 (n=15)       | anti-PD1-naive melanoma patients (48-90 y/o, 60% male) (n=20)                                                                                                       | NA                                                                    |
|                                           |                                                                                                                                                                                                                                                  | *randomly assigned donor                                             |                                                                                                                                                                     |                                                                       |
|                                           | *3/10 success rate (30%)                                                                                                                                                                                                                         | *6/15 success rate (40%)                                             | *57-75% success rate                                                                                                                                                |                                                                       |
| <b>Preparation</b>                        | *colonoscopy (day 0):<br>50 g feces --> normal saline suspension -> sieve -> 3x concentrate -> NSS + 10% glycerol<br>*oral capsule (from day 1, every 2 weeks):<br>15 g feces -> concentrate -> NSS + 10% glycerol -> hypromellose capsule (x12) | *endoscopy                                                           | single FMT by oral capsules (day 1):<br>80-100 g feces -> 0.9% normal saline + glycerol -> filter à sediment ( $10^{13}$ CFU/mL) -> gelatin capsule -> flash freeze | NA                                                                    |
| <b>ICI treatment</b>                      | microbiota depletion -> colonoscopy FMT -> capsule FMT -> ICI on day 14 of FMT -> ICI every 2 weeks                                                                                                                                              | endoscopy FMT + ICI on day 0 of FMT -> ICI every 3 weeks             | PEG laxative -> capsule FMT (x36-40) -> ICI on day 7 of FMT -> ICI every 3-4 weeks                                                                                  | NA                                                                    |
| <b>Baseline timepoint/ FMT initiation</b> | day 0 (pre-FMT)                                                                                                                                                                                                                                  | day 0 (pre-FMT)                                                      | day 0 (pre-FMT, day 1 post-laxative)                                                                                                                                | NA                                                                    |
| <b>Anti-PD1 initiation timepoint</b>      | day 14 of FMT                                                                                                                                                                                                                                    | day 0                                                                | day 7 of FMT                                                                                                                                                        | day 0                                                                 |
| <b>Study design</b>                       | 1 sample per patient at each fixed timepoint (day 0, 7, 31, 65)                                                                                                                                                                                  | multiple samples from patients at variable timepoints (day 0 to 558) | 1 sample per patient at each fixed timepoint (day 0, 7, 28, 56)                                                                                                     | multiple samples from patients at variable timepoints (day 0 to 277)* |

**Table S8. Description of external studies analyzed, related to Figure 2.**

Cohort details of the external melanoma (Bjork et al., 2023) and fecal microbiota transplant (Baruch et al., 2021; Davar et al., 2021; Routy et al., 2023) longitudinal anti-PD-1 datasets used for comparison against our melanoma anti-PD-1 cohort.

\*In analyses done in our study, only timepoints 0 to 4 months (day 120) were included, where the bulk of the samples were
